# Supplementary material for: Human and feline adipose-derived mesenchymal stem cells have comparable phenotype, immunomodulatory functions, and transcriptome
Source: Stem Cell Res Ther. 2017 Mar 20;8:69. doi: 10.1186/s13287-017-0528-z (PMC5360077; doi:10.1186/s13287-017-0528-z)
Supplement: Additional file 2: Figure S2. — Transcriptome analysis of ASCs. Full dataset of ASC gene expression profile. RNA-Seq analysis was performed on total mRNA prepared from three separate feline noninduced ASC culture preparations (passage 3), followed by data analysis with a standard HISAT-Cufflinks pipeline to yield gene expression values expressed as FPKM. (XLSX 1420 kb) [file 13287_2017_528_MOESM2_ESM.xlsx]

## Sheet: Cat_MSC_Cuffdiff_genes_v3
			Normalized FPKM Values
Gene ID	Ensembl_ID	Locus	Feline ASC 1	Feline ASC 2	Feline ASC 3
DDX26B	ENSFCAG00000000001	X:110556897-110612747	1.79629	2.52246	2.42897
-	ENSFCAG00000000006	C2:103066875-103067629	0	0	0
HMGCR	ENSFCAG00000000007	A1:140213417-140228178	52.6054	68.4539	51.502
CEP192	ENSFCAG00000000015	D3:33299323-33424858	7.06339	6.21855	7.593
FAM98B	ENSFCAG00000000021	B3:66284127-66312631	13.3001	15.0318	15.1261
RASGRP1	ENSFCAG00000000022	B3:66205138-66278215	0.0896561	0	0
GPR39	ENSFCAG00000000023	C1:124277605-124278079	0	0	0
LYPD1	ENSFCAG00000000024	C1:124278504-124314569	0	0.450681	0.15624
-	ENSFCAG00000000028	E2:7825522-8029291	83.0016	117.913	116.444
APOO	ENSFCAG00000000029	X:19519280-19554054	13.1928	16.3873	15.5312
CXorf58	ENSFCAG00000000030	X:19581044-19601763	0.284753	0.546509	0.43288
C4orf19	ENSFCAG00000000031	B1:174161332-174191924	0.363974	0.133757	0.72679
RELL1	ENSFCAG00000000032	B1:174076668-174128874	21.6373	16.3763	16.58
DRC1	ENSFCAG00000000034	A3:121395636-121426627	0.299508	0.200468	0.293059
OTOF	ENSFCAG00000000035	A3:121301900-121394081	0	0	0
C2orf70	ENSFCAG00000000036	A3:121284682-121297863	0	0	0
KAT5	ENSFCAG00000000038	D1:110245530-110252928	8.99848	8.28351	8.90352
RNASEH2C	ENSFCAG00000000042	D1:110253530-110254701	27.5985	23.1845	25.678
PPARGC1A	ENSFCAG00000000043	B1:186288470-186384319	0.206055	0.905862	0.198361
LRP6	ENSFCAG00000000044	B4:48252645-48405273	17.0783	14.99	16.7716
-	ENSFCAG00000000045	B3:60957026-60957268	0	0	0
MANSC1	ENSFCAG00000000046	B4:48467435-48480210	46.4032	42.2522	50.893
-	ENSFCAG00000000049	B2:139057411-139332962	6.62719	7.45698	6.64039
TARDBP	ENSFCAG00000000050	C1:7182615-7190003	39.4468	38.2208	42.34
MASP2	ENSFCAG00000000051	C1:7193576-7206759	0.447043	0.614015	0.122258
EXOSC10	ENSFCAG00000000052	C1:7220808-7245727	21.3465	23.1927	20.0121
MTOR	ENSFCAG00000000053	C1:7249491-7380851	12.3273	14.2948	12.2537
ANGPTL7	ENSFCAG00000000055	C1:7249491-7380851	0.131421	0.0484007	0
UBIAD1	ENSFCAG00000000057	C1:7398540-7399029	17.9731	20.8712	22.0098
PTCHD2	ENSFCAG00000000059	C1:7579331-7609081	4.71354	6.39264	10.5003
FBXO6	ENSFCAG00000000061	C1:7719127-7723407	36.7467	18.876	28.4153
MAD2L2	ENSFCAG00000000062	C1:7724109-7729205	12.7731	12.1806	13.1842
DRAXIN	ENSFCAG00000000063	C1:7748329-7757366	0.0429363	0	0
AGTRAP	ENSFCAG00000000064	C1:7781816-7786277	34.3148	30.6158	44.4554
ISL2	ENSFCAG00000000066	B3:31322108-31327217	0	0.589523	0
MTHFR	ENSFCAG00000000067	C1:7820495-7831305	5.92136	7.02875	5.89014
CLCN6	ENSFCAG00000000068	C1:7833832-7866342	8.03889	7.6459	8.09023
SEC24B	ENSFCAG00000000069	B1:113901198-113973728	34.0037	36.3466	31.3966
NPPA	ENSFCAG00000000070	C1:7869435-7870506	0	0.187629	0
NPPB	ENSFCAG00000000072	C1:7878248-7878865	17.1153	177.467	25.6647
PLOD1	ENSFCAG00000000074	C1:7940558-7969394	80.9824	117.809	112.399
ENPEP	ENSFCAG00000000075	B1:113020187-113105612	0.0970982	0.0533901	0.0867666
MFN2	ENSFCAG00000000076	C1:7980580-8006572	37.3707	36.9367	38.261
MIIP	ENSFCAG00000000077	C1:8017113-8028704	8.88567	7.22928	10.5916
ADCY6	ENSFCAG00000000079	B4:78266769-78310180	17.7521	17.9697	11.6824
CACNB3	ENSFCAG00000000080	B4:78338128-78345998	27.1043	23.869	17.3751
EFCAB12	ENSFCAG00000000081	A2:53109585-53133015	0	0	0
DDX23	ENSFCAG00000000082	B4:78347902-78360962	24.9862	23.438	26.7248
MBD4	ENSFCAG00000000083	A2:53135570-53145044	8.27847	5.8017	8.96814
RND1	ENSFCAG00000000084	B4:78365586-78372175	1.17156	2.59422	1.86865
CCDC65	ENSFCAG00000000085	B4:78405415-78416702	2.20657	1.39502	1.85435
IFT122	ENSFCAG00000000086	A2:53145418-53219957	8.64291	6.81502	6.98325
FKBP11	ENSFCAG00000000087	B4:78417197-78420336	37.4877	41.9034	84.6571
ARF3	ENSFCAG00000000088	B4:78430527-78445206	60.7041	73.8131	59.84
WNT1	ENSFCAG00000000089	B4:78463919-78466893	0.0536567	0	0
DDN	ENSFCAG00000000090	B4:78479350-78481885	0	0.0258818	0
PRKAG1	ENSFCAG00000000091	B4:78485437-78493634	20.3933	16.5276	20.1496
RHO	ENSFCAG00000000092	A2:53225668-53231412	0	0	0.130151
KMT2D	ENSFCAG00000000093	B4:78500668-78532730	7.42081	9.87824	8.47156
H1FOO	ENSFCAG00000000094	A2:53248675-53251153	0	0	0
PLXND1	ENSFCAG00000000095	A2:53253542-53314603	16.4247	5.12921	19.0149
RHEBL1	ENSFCAG00000000096	B4:78541314-78544523	0.305051	0.201465	0.329821
DHH	ENSFCAG00000000097	B4:78559843-78563987	0.0504059	0.273963	0.119587
LMBR1L	ENSFCAG00000000098	B4:78564345-78578022	7.03755	7.81775	8.72877
NFKBIL1	ENSFCAG00000000103	B2:33209161-33219107	12.8808	9.55929	10.9714
CFI	ENSFCAG00000000105	B1:113700832-113732029	2.37263	1.12491	1.12166
C9orf135	ENSFCAG00000000106	D4:12283268-12360642	4.43642	3.21279	3.5022
SMC5	ENSFCAG00000000108	D4:12645149-12738883	11.6675	12.8276	13.3357
KLF9	ENSFCAG00000000110	D4:12814271-12837141	37.9554	45.8211	29.1493
GNGT2	ENSFCAG00000000111	E1:38258464-38259053	0	0	0
TRPM3	ENSFCAG00000000112	D4:12931152-13184300	0.0238688	0.0612287	0.018434
PHOSPHO1	ENSFCAG00000000113	E1:38244563-38245289	0.573674	0.209621	0.603911
ZNF652	ENSFCAG00000000115	E1:38154242-38203256	8.55875	9.31345	8.92994
MMP13	ENSFCAG00000000118	D1:1498867-1509631	0	0	0
VN1R2	ENSFCAG00000000122	E2:4190229-4191114	0	0.171828	0.237459
PSCA	ENSFCAG00000000123	F2:81158680-81161026	0	0	0
SLURP1	ENSFCAG00000000125	F2:81173082-81174631	0	0	0
LYPD2	ENSFCAG00000000126	F2:81178018-81179671	0	0	0
ZNF672	ENSFCAG00000000129	A1:83397741-83400136	1.9958	1.16509	1.7316
ZNF692	ENSFCAG00000000130	A1:83400722-83408721	2.36382	3.0921	2.33403
MBOAT4	ENSFCAG00000000132	B1:26278494-26286606	0	0	0.0349844
-	ENSFCAG00000000133	B1:26298839-26315259	30.6785	31.1944	31.5819
C9orf116	ENSFCAG00000000136	D4:92655847-92664175	1.13471	0.651182	0.669603
MRPS2	ENSFCAG00000000137	D4:92655847-92664175	43.6641	35.3979	39.3471
CCND2	ENSFCAG00000000138	B4:38702614-38727166	120.417	80.8844	58.9812
FGF23	ENSFCAG00000000141	B4:38785406-38793337	0	0	0
FGF6	ENSFCAG00000000142	B4:38845071-38856169	0	0	0
C12orf4	ENSFCAG00000000143	B4:38895879-38944530	10.7213	9.3251	11.7852
FKBP4	ENSFCAG00000000145	B4:37307720-37314173	40.0785	38.6797	52.463
ITFG2	ENSFCAG00000000146	B4:37320837-37332460	2.50412	2.48949	2.55782
-	ENSFCAG00000000147	B4:37353980-37359288	0.0545545	0	0.0426005
TULP3	ENSFCAG00000000149	B4:37381171-37447066	17.2302	13.6535	20.2647
TEAD4	ENSFCAG00000000150	B4:37486756-37526485	24.624	18.3749	19.0054
C1orf146	ENSFCAG00000000151	C1:77188837-77236677	0	0.177562	0.354159
OCA2	ENSFCAG00000000153	B3:27149063-27259959	0.230092	0	0.0761284
HERC2	ENSFCAG00000000154	B3:27371205-27648288	8.90832	10.1762	9.26615
-	ENSFCAG00000000158	E2:6843231-6865384	5.49523	1.9738	3.7596
ATP6V1G1	ENSFCAG00000000160	D4:76568530-76575173	194.252	180.405	174.024
C9orf91	ENSFCAG00000000162	D4:76588065-76610479	9.82387	6.4486	9.19474
AMBP	ENSFCAG00000000163	D4:76129548-76143197	0	0	0.0607082
KIF12	ENSFCAG00000000164	D4:76152692-76159870	0	0	0
COL27A1	ENSFCAG00000000165	D4:76264226-76345246	0.440189	0.666263	0.586902
-	ENSFCAG00000000166	D4:76356300-76359484	0	0	0
AKNA	ENSFCAG00000000167	D4:76361440-76401202	15.4638	11.9581	12.5438
SLBP	ENSFCAG00000000169	B1:199598363-199607199	31.0311	20.5163	32.1881
DFNB31	ENSFCAG00000000170	D4:76421158-76513832	0.0354146	0.0580065	0
TACC3	ENSFCAG00000000171	B1:199621048-199631503	13.1118	6.84442	17.078
TNFSF15	ENSFCAG00000000174	D4:76729882-76746002	0	0	0
C1S	ENSFCAG00000000175	B4:41266633-41274673	259.479	100.15	162.7
C1R	ENSFCAG00000000177	B4:41294400-41304010	274.203	125.437	156.797
BACE1	ENSFCAG00000000178	D1:14874561-14894583	10.205	9.07374	9.17179
C1RL	ENSFCAG00000000179	B4:41309668-41322845	12.6526	4.60806	7.77989
CEP164	ENSFCAG00000000180	D1:14908215-14969550	3.53449	3.72671	4.70082
RBP5	ENSFCAG00000000182	B4:41349938-41353379	0	0	0
CLSTN3	ENSFCAG00000000183	B4:41355456-41381446	1.35165	0.130544	0.0465545
PEX5	ENSFCAG00000000184	B4:41398418-41417671	20.0236	26.1593	13.7144
LRP1	ENSFCAG00000000185	B4:85912858-85994261	352.823	426.158	421.295
NHS	ENSFCAG00000000186	X:13617555-13669148	1.41302	4.2552	1.18039
RAI2	ENSFCAG00000000187	X:13709132-13710704	2.32625	4.59784	3.79196
SHMT2	ENSFCAG00000000188	B4:86010222-86015375	202.211	249.286	243.75
NDUFA4L2	ENSFCAG00000000189	B4:86016573-86018139	70.9734	17.9086	25.6562
STAC3	ENSFCAG00000000190	B4:86024990-86030459	0.353772	0.301701	0.150961
R3HDM2	ENSFCAG00000000192	B4:86034074-86077319	39.1335	34.0506	36.807
ITIH2	ENSFCAG00000000194	B4:6827629-6865317	0	0	0
KIN	ENSFCAG00000000195	B4:6872262-6908910	6.14917	7.55797	7.79342
ATP5C1	ENSFCAG00000000196	B4:6909033-6928893	132.954	134.179	139.108
TAF3	ENSFCAG00000000197	B4:6935867-7116129	7.68438	6.37646	7.46993
-	ENSFCAG00000000198	D4:68085301-68086255	0	0	0
HMGB1	ENSFCAG00000000200	A1:9581078-9583470	132.113	110.669	147.687
-	ENSFCAG00000000201	B3:72690619-72691582	0	0	0
DEGS1	ENSFCAG00000000202	F1:727625-731303	238.176	290.835	259.228
BOC	ENSFCAG00000000203	C2:59297416-59332560	15.77	15.9406	13.5094
MMACHC	ENSFCAG00000000204	C1:35050192-35069272	1.92941	1.60134	2.44983
FLVCR1	ENSFCAG00000000207	F1:30216051-30250569	7.76982	7.69323	8.5178
ANGEL2	ENSFCAG00000000208	F1:30100946-30138388	11.4538	9.84659	9.25957
SERGEF	ENSFCAG00000000209	D1:75924382-76160435	2.70741	3.30734	3.62484
SAAL1	ENSFCAG00000000210	D1:76228178-76254182	4.52151	6.32832	6.19391
USP25	ENSFCAG00000000211	C2:27489552-27613539	19.5396	13.9989	14.021
CCDC129	ENSFCAG00000000212	A2:123018574-123093709	0	0	0
PPP1R17	ENSFCAG00000000213	A2:123141789-123153230	0	0	0
PDE1C	ENSFCAG00000000214	A2:123189051-123298182	0.0211649	0	0.0652757
SOCS5	ENSFCAG00000000215	A3:68732900-68734511	94.4888	134.325	107.241
GINS1	ENSFCAG00000000218	A3:49653119-49767643	6.29219	4.09311	11.2176
LRCH4	ENSFCAG00000000219	E3:7381368-7392529	11.2115	14.2736	13.0223
CHGB	ENSFCAG00000000220	A3:31880572-31893092	0.181637	0.0330583	0.0924871
SUCNR1	ENSFCAG00000000221	C2:111561770-111562724	0	0.3569	0
CPB1	ENSFCAG00000000222	C2:114512365-114545820	20.996	19.6325	22.1996
CMYA5	ENSFCAG00000000223	A1:144077498-144133842	0.00349691	0.00384197	0.0106217
-	ENSFCAG00000000224	C2:3049928-3052524	0	0	0
-	ENSFCAG00000000225	C2:2884964-2892636	12.2625	11.4914	10.6148
KHDRBS3	ENSFCAG00000000229	F2:75728721-75910352	4.56975	4.0032	3.55047
LSM5	ENSFCAG00000000230	A2:123831561-123834597	43.7811	32.1578	48.0252
DTNB	ENSFCAG00000000232	A3:122082647-122295376	5.96885	3.70077	5.23389
SCN11A	ENSFCAG00000000236	C2:150758998-150844968	0	0	0
FAR2	ENSFCAG00000000237	B4:64385707-64430965	4.56059	5.43416	2.93801
C8orf46	ENSFCAG00000000238	F2:16628803-16649165	0.384089	0.21282	0
JAKMIP3	ENSFCAG00000000239	D2:88577545-88628499	0.0927743	0.0575326	0.0102633
HNF1B	ENSFCAG00000000241	E1:23046074-23091300	0	0	0
-	ENSFCAG00000000242	B2:1955138-1958600	1.6416	1.74463	1.39644
-	ENSFCAG00000000243	A2:5136233-5176174	0	0	0
ZSCAN23	ENSFCAG00000000244	B2:1884621-1885565	3.79784	7.84165	3.82649
EYA1	ENSFCAG00000000245	F2:20850821-21016547	0.129971	0	0.0664926
PIK3C2G	ENSFCAG00000000247	B4:53742516-54063223	0	0	0
LIG3	ENSFCAG00000000249	E1:22171393-22190653	8.57349	13.8945	11.0792
RFFL	ENSFCAG00000000250	E1:22196113-22211778	7.93113	8.3087	8.28643
FNDC8	ENSFCAG00000000252	E1:22283867-22290273	1.30712	0.669616	1.05787
NLE1	ENSFCAG00000000253	E1:22292184-22299819	22.1677	16.4112	21.9741
UNC45B	ENSFCAG00000000254	E1:22304072-22340085	0.148643	0.191676	0.290389
SLFN5	ENSFCAG00000000255	E1:22374216-22383092	9.83915	6.75977	10.0379
TRPM4	ENSFCAG00000000257	E2:8210587-8244963	7.32996	6.12076	5.83101
BAX	ENSFCAG00000000258	E2:8366735-8370296	98.4002	104.983	76.2683
NTF4	ENSFCAG00000000259	E2:8321346-8321979	0.235531	0.129569	0.370961
-	ENSFCAG00000000261	A3:15094520-15094936	0	0	0
ANKRD33	ENSFCAG00000000264	B4:80928632-80931886	0.234692	0.154353	0.111309
ACVRL1	ENSFCAG00000000265	B4:80950409-80958253	5.12302	2.48087	5.54672
GRASP	ENSFCAG00000000267	B4:81034157-81040511	22.0304	14.1936	18.1915
NR4A1	ENSFCAG00000000268	B4:81080019-81085174	19.5833	3.49984	15.9398
KRT7	ENSFCAG00000000270	B4:81207285-81221417	0.115903	0.634375	0.0723304
-	ENSFCAG00000000271	B4:81266950-81273072	0	0	0
-	ENSFCAG00000000272	B4:81252591-81257693	0	0.0281742	0.0401721
OXER1	ENSFCAG00000000273	A3:65077611-65078679	0.0630386	0.139958	0.199726
-	ENSFCAG00000000274	E2:6802378-6811529	0	0	0
-	ENSFCAG00000000275	B4:81222834-81229352	0	0	0
HAAO	ENSFCAG00000000276	A3:65080769-65095202	0	0	0
-	ENSFCAG00000000277	B4:81280739-81287194	0	0	0
KRT85	ENSFCAG00000000278	B4:81318519-81325510	0	0	0
NAP1L1	ENSFCAG00000000279	B4:102074340-102091602	191.251	219.052	200.868
PVR	ENSFCAG00000000280	E2:11288973-11304380	17.9675	22.8123	19.702
KRT82	ENSFCAG00000000281	B4:81355103-81366042	0	0	0
KRT84	ENSFCAG00000000282	B4:81338403-81345777	0	0	0
CEACAM19	ENSFCAG00000000283	E2:11262051-11278420	0.0609194	0.202534	0.0951595
KRT75	ENSFCAG00000000284	B4:81384780-81394836	0	0	0
-	ENSFCAG00000000285	B4:81412990-81452103	0	0	0
KRT5	ENSFCAG00000000286	B4:81467033-81472654	0	0	0
KRT71	ENSFCAG00000000287	B4:81497968-81506867	0	0	0
KRT74	ENSFCAG00000000288	B4:81518277-81525897	0	0	0
-	ENSFCAG00000000289	B4:81369894-81382656	0	0	0
KRT72	ENSFCAG00000000290	B4:81536354-81565652	0	0	0
KRT1	ENSFCAG00000000291	B4:81614148-81619169	0	0	0
KRT76	ENSFCAG00000000293	B4:81689942-81699150	0	0	0
KRT3	ENSFCAG00000000294	B4:81710774-81716483	0	0	0
KRT4	ENSFCAG00000000295	B4:81728498-81734774	0	0	0
KRT79	ENSFCAG00000000296	B4:81746894-81758413	0	0	0
KRT78	ENSFCAG00000000297	B4:81764381-81772931	0.0547856	0	0.0639791
-	ENSFCAG00000000298	B4:81809521-81816614	0	0.0258298	0
-	ENSFCAG00000000299	B4:81848539-81852835	0.0287178	0	0
EIF4B	ENSFCAG00000000300	B4:81894699-81924571	180.985	160.535	176.572
ARHGEF4	ENSFCAG00000000301	C1:108732887-108878874	0.0786823	0.0143371	0.0205122
-	ENSFCAG00000000303	C1:108884449-108909852	46.7117	39.3981	44.0991
TNS2	ENSFCAG00000000304	B4:81931362-81944192	43.1333	31.6507	42.5406
SPRYD3	ENSFCAG00000000305	B4:81944802-81959730	36.8851	49.3245	38.2559
IGFBP6	ENSFCAG00000000306	B4:81972071-81975696	321.316	436.645	385.324
SOAT2	ENSFCAG00000000307	B4:81977216-81986400	4.52603	3.36458	4.21051
WT1	ENSFCAG00000000308	D1:88547583-88597141	0.162663	4.75991	0.0473909
EIF3M	ENSFCAG00000000310	D1:88731621-88881195	110.209	118.363	112.337
-	ENSFCAG00000000311	D2:47644105-47650764	0	0	0
GPRIN2	ENSFCAG00000000312	D2:47678338-47679712	0	0	0
-	ENSFCAG00000000313	E3:5125710-5356187	0	0	0
BHLHA15	ENSFCAG00000000315	E3:5357265-5359036	0.334445	0.753049	1.16969
TECPR1	ENSFCAG00000000316	E3:5360587-5386980	2.30662	2.56666	2.12862
BAIAP2L1	ENSFCAG00000000317	E3:5418775-5486008	0.334386	3.34221	0.511637
OAS1	ENSFCAG00000000318	D3:10733159-10745948	5.3109	2.05484	2.74414
OAS3	ENSFCAG00000000320	D3:10752195-10770042	4.83907	3.62218	3.42713
MYH14	ENSFCAG00000000321	E2:7384744-7473701	0.108502	0.146922	0.0530012
OAS2	ENSFCAG00000000322	D3:10776422-10794769	27.7698	13.1324	9.25362
RASAL1	ENSFCAG00000000323	D3:10814995-10876721	0.117086	0.213055	0.153661
NAPSA	ENSFCAG00000000324	E2:7353852-7363686	0.123943	0.456189	0.324259
POLD1	ENSFCAG00000000325	E2:7308341-7325642	19.0759	10.3721	21.6861
-	ENSFCAG00000000327	E2:7302061-7304674	0.152732	0	0.120105
RITA1	ENSFCAG00000000328	D3:10914471-10917673	25.4085	26.5844	24.2313
MYBPC2	ENSFCAG00000000329	E2:7272513-7298328	0.0203127	0.0222156	0
IQCD	ENSFCAG00000000330	D3:10918494-10925472	0.450625	0.655616	0.791621
FAM71E1	ENSFCAG00000000332	E2:7266945-7272089	0.285347	0.187922	0.089033
SLC8B1	ENSFCAG00000000333	D3:11006043-11026668	13.7195	12.9486	14.4577
EMC10	ENSFCAG00000000334	E2:7259360-7266637	60.7227	78.8547	63.5242
SHANK1	ENSFCAG00000000335	E2:7091673-7131945	0.670709	0.110519	0.788424
CHRM1	ENSFCAG00000000336	D1:108091100-108092483	1.52793	0.938857	2.47567
SAR1B	ENSFCAG00000000338	A1:112026021-112038657	71.1641	73.8413	73.4945
SERINC3	ENSFCAG00000000341	A3:16058415-16069491	61.3243	49.0996	46.6315
CYP1A2	ENSFCAG00000000344	B3:33511988-33516370	0	0	0
SLC16A12	ENSFCAG00000000345	D2:52399198-52419706	0	0	0
CSK	ENSFCAG00000000347	B3:33466298-33484008	39.3797	40.4195	43.2628
CDC73	ENSFCAG00000000348	F1:47206406-47330777	15.8674	19.3425	17.3943
BCL9	ENSFCAG00000000349	C1:101274805-101287817	4.69821	5.4917	5.30803
LMAN1L	ENSFCAG00000000350	B3:33448706-33460389	0	0	0
GJA5	ENSFCAG00000000351	C1:101398437-101399514	0.341365	0.0540701	0.268522
SCAMP2	ENSFCAG00000000352	B3:33407697-33430361	49.6898	50.9678	52.6457
ZFR	ENSFCAG00000000354	A1:213244878-213326801	36.1458	42.6517	37.5881
SLC22A3	ENSFCAG00000000355	B2:146212005-146404452	0.808671	0.660381	0.309548
MAP3K4	ENSFCAG00000000356	B2:146500461-146574108	5.07096	5.32556	4.94812
AGPAT4	ENSFCAG00000000357	B2:146581693-146612100	10.2457	15.1439	9.29446
CDH6	ENSFCAG00000000359	A1:214157796-214208870	0.0168787	0.0185643	0
DROSHA	ENSFCAG00000000360	A1:213974962-214098713	14.5102	14.6967	14.8904
UNC79	ENSFCAG00000000362	B3:137728093-137952847	0.0591078	0.0236364	0.0662339
PRIMA1	ENSFCAG00000000363	B3:137964907-138023077	118.146	101.996	56.0595
ATP6V1F	ENSFCAG00000000364	A2:145309667-145312464	46.0801	34.5082	38.0324
CIB4	ENSFCAG00000000368	A3:121231748-121283109	0	0	0
AREG	ENSFCAG00000000370	B1:145402470-145412629	1.79472	0.987503	3.37205
KANK4	ENSFCAG00000000371	C1:50073096-50096193	22.356	22.3497	29.6825
PRKRIP1	ENSFCAG00000000372	E3:8690281-8728108	9.14042	11.696	11.4303
-	ENSFCAG00000000375	X:3110375-3385224	0.0149174	0	0
LRWD1	ENSFCAG00000000376	E3:8750412-8763425	15.9794	16.8819	17.2269
POLR2J	ENSFCAG00000000377	E3:8764008-8767270	54.1811	58.3678	62.4185
-	ENSFCAG00000000379	E3:8769060-8793313	8.79631	7.25733	11.8227
SLCO4A1	ENSFCAG00000000381	A3:1361921-1373387	1.66799	1.38234	0.496994
NTSR1	ENSFCAG00000000383	A3:1299830-1346811	0	0	0.503923
ARNTL2	ENSFCAG00000000386	B4:62606837-62670664	0	0	0.0253094
SMCO2	ENSFCAG00000000387	B4:62742093-62776287	0	0	0
EDF1	ENSFCAG00000000388	D4:95102459-95105784	219.297	201.634	223.322
TRAF2	ENSFCAG00000000389	D4:95125032-95139060	6.77334	6.10153	7.90184
-	ENSFCAG00000000390	A3:104193172-104193883	0	0	0
FBXW5	ENSFCAG00000000391	D4:95148350-95151272	63.5756	65.7351	59.2272
C8G	ENSFCAG00000000392	D4:95152558-95153903	2.85136	4.29906	2.73339
PTGDS	ENSFCAG00000000393	D4:95174106-95337341	4.16052	10.8047	8.69325
C9orf142	ENSFCAG00000000394	D4:95174106-95337341	93.563	69.5627	77.1903
CLIC3	ENSFCAG00000000395	D4:95174106-95337341	9.26268	1.8293	7.48601
ABCA2	ENSFCAG00000000396	D4:95174106-95337341	16.7809	10.3388	17.3457
NPDC1	ENSFCAG00000000398	D4:95174106-95337341	174.025	139.766	186.191
ENTPD2	ENSFCAG00000000399	D4:95174106-95337341	1.26184	0.324147	0.563599
AMPD3	ENSFCAG00000000400	D1:69084943-69121578	20.1631	15.7613	14.9457
UAP1L1	ENSFCAG00000000401	D4:95174106-95337341	18.012	5.60151	3.59108
LYVE1	ENSFCAG00000000404	D1:69173852-69186390	0.0968029	0.5883	0
MRVI1	ENSFCAG00000000405	D1:69198792-69272744	12.6706	44.0671	11.9308
CTR9	ENSFCAG00000000407	D1:69360299-69387149	23.4295	21.707	20.3823
CCDC89	ENSFCAG00000000408	D1:49466823-49467936	0.290053	1.38531	0.225424
PARN	ENSFCAG00000000409	E3:30893715-31060687	20.6171	18.029	17.1503
ZBED5	ENSFCAG00000000411	D1:69448516-69450598	10.7103	12.1853	9.49274
BMP7	ENSFCAG00000000413	A3:5746552-5836209	0.0260757	0	0
BFAR	ENSFCAG00000000414	E3:30855696-30875438	32.9948	38.8689	36.3715
SPO11	ENSFCAG00000000415	A3:5685314-5698028	0	0	0
RAE1	ENSFCAG00000000416	A3:5658804-5679822	12.6374	14.8547	14.5956
RBM38	ENSFCAG00000000417	A3:5629840-5644149	13.3547	14.6912	13.7953
PCK1	ENSFCAG00000000419	A3:5497985-5506254	0	0	0
ZBP1	ENSFCAG00000000420	A3:5450841-5464106	0	0	0
NRP2	ENSFCAG00000000423	C1:191198176-191311593	10.0864	15.5515	8.4992
RAB9B	ENSFCAG00000000424	X:83331531-83332137	1.28736	0.712849	1.89005
SCN3B	ENSFCAG00000000425	D1:20466452-20493344	0	0	0
FGL1	ENSFCAG00000000427	B1:19011513-19066127	3.02721	2.35658	0.927536
-	ENSFCAG00000000429	B2:87406581-87408243	0	0	0
ITGA6	ENSFCAG00000000430	C1:161022909-161060567	1.54111	4.67881	2.52749
CREBZF	ENSFCAG00000000431	D1:49485321-49486243	12.0898	18.7444	14.5878
STK10	ENSFCAG00000000434	A1:177314066-177433099	24.1708	29.6609	29.5685
GNS	ENSFCAG00000000437	B4:92363733-92418255	113.443	89.4663	102.693
DHX30	ENSFCAG00000000438	A2:16822444-16841977	14.8143	17.3909	14.6683
GPR155	ENSFCAG00000000439	C1:162765169-162806135	4.2278	3.38549	3.74037
GLDC	ENSFCAG00000000440	D4:34565408-34667439	0	0	0
AGAP1	ENSFCAG00000000441	C1:216570694-216928482	24.5401	20.7862	21.2151
CSRP1	ENSFCAG00000000442	F1:39770883-39782482	193.059	966.63	258.373
NAV1	ENSFCAG00000000443	F1:39912741-40060649	23.7147	25.8662	28.9948
IPO9	ENSFCAG00000000444	F1:40069465-40126418	23.2697	22.1953	23.4665
SHISA4	ENSFCAG00000000445	F1:40133622-40136051	68.2165	69.2697	70.2608
LMOD1	ENSFCAG00000000446	F1:40142051-40182601	27.3605	108.774	22.0345
RNPEP	ENSFCAG00000000448	F1:40219043-40237595	47.9655	50.9144	50.3985
ELF3	ENSFCAG00000000449	F1:40241643-40245705	0.165443	0.318848	0.0968338
GPR37L1	ENSFCAG00000000450	F1:40323508-40327713	0	0	0
UBE2T	ENSFCAG00000000452	F1:40511030-40519299	10.0934	5.80454	8.88244
PPP1R12B	ENSFCAG00000000453	F1:40524790-40735500	0.627532	0.80928	0.67247
SYT2	ENSFCAG00000000454	F1:40751315-40760074	0.143206	0.251539	0.242344
HNRNPDL	ENSFCAG00000000455	B1:138183580-138187389	125.867	144.691	147.238
KPNA6	ENSFCAG00000000456	C1:23453001-23484036	27.8741	32.2439	29.507
-	ENSFCAG00000000457	D1:65092780-65093767	0	0	0
DLK1	ENSFCAG00000000458	B3:144107574-144113882	0	0	0
WDR83OS	ENSFCAG00000000463	A2:8788576-8797392	64.1232	47.5902	62.3975
DHPS	ENSFCAG00000000465	A2:8788576-8797392	22.23	17.768	18.4692
FBXW9	ENSFCAG00000000466	A2:8802019-8807396	11.0432	6.03357	10.2152
TNPO2	ENSFCAG00000000467	A2:8811143-8825502	15.0538	17.0165	15.2015
ASNA1	ENSFCAG00000000468	A2:8834865-8842054	40.4253	33.3916	35.523
BEST2	ENSFCAG00000000470	A2:8845499-8849489	0.0363654	0	0
PRDX2	ENSFCAG00000000473	A2:8877376-8879779	106.8	124.878	125.609
RNASEH2A	ENSFCAG00000000474	A2:8881852-8887940	13.2319	7.96062	13.1184
MAST1	ENSFCAG00000000475	A2:8906593-8927587	0.178378	0.183639	0.148296
DNASE2	ENSFCAG00000000476	A2:8928072-8930529	13.9973	11.9802	14.1858
GCDH	ENSFCAG00000000477	A2:8939000-9075785	15.6729	13.912	18.1945
CALR	ENSFCAG00000000479	A2:8939000-9075785	556.401	676.743	708.38
NFIX	ENSFCAG00000000481	A2:8939000-9075785	130.269	87.6745	106.317
-	ENSFCAG00000000482	A2:9085870-9086197	1.19759	1.00598	1.62546
TRMT1	ENSFCAG00000000483	A2:9089374-9099287	9.47051	7.72999	9.69677
STX10	ENSFCAG00000000484	A2:9120629-9123032	6.70506	3.28418	4.97065
IER2	ENSFCAG00000000485	A2:9126289-9127238	100.992	119.474	105.429
CACNA1A	ENSFCAG00000000486	A2:9159168-9329932	0.798895	1.86495	1.43813
MYL1	ENSFCAG00000000487	C1:195134824-195156189	0	0	0
IDNK	ENSFCAG00000000492	D4:24633937-24641462	1.72191	0.738378	0.661276
FAM69B	ENSFCAG00000000493	D4:94985631-94990315	0.158547	0.0436363	0.0936157
ADAMTS4	ENSFCAG00000000494	F1:63119299-63126256	1.53108	5.99851	3.54461
PCM1	ENSFCAG00000000496	B1:18933382-18998999	23.7004	21.3466	26.8638
NR1I3	ENSFCAG00000000497	F1:63087444-63091912	0	0	0
MPZ	ENSFCAG00000000498	F1:63034625-63038902	0	0	0
SDHC	ENSFCAG00000000499	F1:62995079-63030586	99.8892	108.288	86.5224
OR2B3	ENSFCAG00000000501	B2:1104866-1106243	0	0	0
FOXC1	ENSFCAG00000000502	B2:26813994-26815520	3.31548	8.36466	3.5493
NME6	ENSFCAG00000000503	A2:17167115-17170972	14.5264	12.123	15.5917
ACTRT3	ENSFCAG00000000504	C2:95463244-95465150	0.0978857	0	0
MYNN	ENSFCAG00000000505	C2:95446080-95459134	8.09072	7.23485	7.24439
EGF	ENSFCAG00000000506	B1:113485302-113581422	0.0138497	0	0
PLCB3	ENSFCAG00000000507	D1:109034304-109046234	17.1364	26.9898	19.9306
BAD	ENSFCAG00000000508	D1:109049173-109058772	44.8123	37.7095	41.3621
CCDC88B	ENSFCAG00000000511	D1:109100385-109115441	1.25764	0.827409	0.373966
RPS6KA4	ENSFCAG00000000512	D1:109118210-109128188	96.6684	75.5987	87.4623
RAI14	ENSFCAG00000000513	A1:211548094-211605898	38.7065	70.0977	47.5144
TTC23L	ENSFCAG00000000514	A1:211494459-211536802	0.142441	0.312365	0.192203
CABLES1	ENSFCAG00000000515	D3:47150168-47216730	8.08078	6.31625	3.82136
RIOK3	ENSFCAG00000000517	D3:47371431-47398816	17.7533	20.4663	17.466
C18orf8	ENSFCAG00000000518	D3:47415585-47487499	26.7312	29.8878	25.2448
NPC1	ENSFCAG00000000519	D3:47415585-47487499	31.1679	28.5726	32.1138
HS3ST5	ENSFCAG00000000523	B2:105012626-105017148	1.48393	0.50313	0.825929
CDK15	ENSFCAG00000000530	C1:187677152-187753463	2.99617	0.261266	1.79134
BIN1	ENSFCAG00000000531	C1:112011255-112038936	34.0475	21.8579	26.9352
ZBTB47	ENSFCAG00000000532	C2:147598136-147605602	19.6509	18.7242	22.3857
HHATL	ENSFCAG00000000533	C2:147568061-147582081	0.0355351	0.0392781	0.0279002
CREBRF	ENSFCAG00000000534	A1:176542331-176593219	4.07161	2.23901	2.41569
CCDC13	ENSFCAG00000000535	C2:147520291-147562802	0.089063	0.0265653	0.107292
BNIP1	ENSFCAG00000000536	A1:176519549-176532279	10.2596	10.9115	9.32805
-	ENSFCAG00000000537	C2:147496233-147497823	179.264	231.733	206.806
NKX2-5	ENSFCAG00000000539	A1:176467529-176470085	0	22.6621	0
POMGNT2	ENSFCAG00000000541	C2:147292512-147294255	4.27752	4.44965	6.80196
C1QC	ENSFCAG00000000542	C1:15872435-15876540	0.0466526	0	0
C1QB	ENSFCAG00000000543	C1:15883777-15885697	0.123045	0.265226	0
EPHB1	ENSFCAG00000000544	C2:126785543-127093695	0.0785014	0.133723	0.16232
CRB1	ENSFCAG00000000545	F1:35927869-36138801	0	0.033877	0
-	ENSFCAG00000000546	C1:36954559-36980224	10.7986	3.23962	10.5986
SLC5A9	ENSFCAG00000000548	C1:37282728-37304743	0	0	0
AGBL4	ENSFCAG00000000550	C1:37567576-38022729	0	0	0
BEND5	ENSFCAG00000000551	C1:37567576-38022729	1.59332	1.24915	1.97464
OR5M8	ENSFCAG00000000552	D1:103338978-103339914	0	0	0
TSPAN1	ENSFCAG00000000553	C1:35756412-35760647	0.257045	0.0947601	0
POMGNT1	ENSFCAG00000000554	C1:35764018-35772875	23.9563	30.6569	23.1455
LURAP1	ENSFCAG00000000555	C1:35776833-35787008	1.01153	0.160106	0.341859
PARP9	ENSFCAG00000000557	C2:67705843-67738046	4.7446	3.45449	3.82536
WNT3A	ENSFCAG00000000558	A1:89474682-89501545	0	0	0.0402931
WNT9B	ENSFCAG00000000559	E1:45309193-45313018	0	0	0
RBM26	ENSFCAG00000000561	A1:52479994-52528867	10.0696	11.4331	12.1831
PRTFDC1	ENSFCAG00000000562	B4:22775023-22871525	10.8205	24.1605	14.5926
CTDP1	ENSFCAG00000000566	D3:95208008-95443744	16.6583	17.0855	16.8078
PQLC1	ENSFCAG00000000567	D3:95208008-95443744	9.19692	10.6346	8.72999
TXNL4A	ENSFCAG00000000568	D3:95452878-95464515	35.3588	30.2291	33.9815
RBFA	ENSFCAG00000000569	D3:95492947-95502751	21.0975	20.5661	19.7836
C3orf49	ENSFCAG00000000570	A2:30882060-30903421	0.177222	0.195681	0.181027
PSMD6	ENSFCAG00000000573	A2:31069597-31085359	61.9521	65.7373	61.1465
CADPS2	ENSFCAG00000000574	A2:139864072-140408508	0.615448	0.591466	1.08878
CPN1	ENSFCAG00000000575	D2:60863644-60887620	0.0545165	0	0
DHRS3	ENSFCAG00000000576	C1:8485751-8525777	8.0069	11.9867	5.019
-	ENSFCAG00000000577	C1:8592253-8592900	0	0	0
LRRC38	ENSFCAG00000000580	C1:8730414-8764237	0	0.23973	0.339698
ETV3L	ENSFCAG00000000582	F1:66096987-66101076	1.30137	0.79961	0.981503
ETV3	ENSFCAG00000000583	F1:66063555-66076119	11.3642	13.5233	9.65476
-	ENSFCAG00000000585	B4:4574421-4584954	2.54076	1.52401	3.05998
ELOVL5	ENSFCAG00000000586	B2:53368731-53394242	51.1735	64.836	54.7973
ZDHHC2	ENSFCAG00000000587	B1:19712109-19752028	7.68114	15.3064	4.85755
-	ENSFCAG00000000589	B1:44440897-44568664	0	0	0
CALML3	ENSFCAG00000000590	B4:4698408-4698858	0	0	0
CNOT7	ENSFCAG00000000591	B1:19687750-19702122	38.7032	40.7477	44.451
LARP1	ENSFCAG00000000592	A1:192631260-192653215	68.9013	63.5044	67.1005
FAXDC2	ENSFCAG00000000593	A1:192614682-192627777	15.4754	1.34264	7.55481
CNOT8	ENSFCAG00000000594	A1:192581209-192589562	14.5291	10.3562	11.7666
GEMIN5	ENSFCAG00000000595	A1:192502518-192576954	14.8517	10.6131	13.3706
POR	ENSFCAG00000000597	E3:9145653-9180692	59.918	50.3111	63.4145
TMEM120A	ENSFCAG00000000598	E3:9145653-9180692	72.3718	69.7464	77.7842
MDH2	ENSFCAG00000000600	E3:9055452-9144498	95.3645	116.767	96.4603
SRRM3	ENSFCAG00000000601	E3:8982751-9014933	0	0	0.0172885
YWHAH	ENSFCAG00000000603	D3:22909582-22910251	151.298	197.911	163.612
-	ENSFCAG00000000605	X:81890975-81903593	0	0	0
SERBP1	ENSFCAG00000000606	C1:54842013-54855459	217.894	213.27	219.872
PIH1D2	ENSFCAG00000000608	D1:10037849-10042865	1.38373	1.39777	0.621332
PHF8	ENSFCAG00000000609	X:45811950-45906691	4.17784	4.25759	4.14144
-	ENSFCAG00000000610	F1:65302688-65305571	0	0	0
SLC3A1	ENSFCAG00000000611	A3:66439916-66530384	4.24284	2.13386	3.14803
PREPL	ENSFCAG00000000612	A3:66439916-66530384	9.64579	6.27557	7.15714
-	ENSFCAG00000000614	E2:982452-993976	0.408377	0.545654	0.134355
-	ENSFCAG00000000618	B4:107853934-108047253	0	0	0
FBXW7	ENSFCAG00000000620	B1:75818378-76045417	3.10451	4.45559	2.85782
BRAP	ENSFCAG00000000621	D3:9397946-9424165	11.4588	11.1683	10.9236
-	ENSFCAG00000000623	A3:55955577-55955964	0	0	0
C18orf21	ENSFCAG00000000626	D3:58472926-58478703	14.7813	12.2194	12.243
-	ENSFCAG00000000629	B2:32667395-32670292	30.0092	44.4835	13.8464
DLGAP2	ENSFCAG00000000631	B1:1166737-1283903	0	0	0
TDRD1	ENSFCAG00000000632	D2:73136295-73177730	0	0	0
VWA2	ENSFCAG00000000633	D2:73196345-73228559	0	0	0
AFAP1L2	ENSFCAG00000000634	D2:73232896-73270057	0.566675	0.929815	0.663735
ABLIM1	ENSFCAG00000000635	D2:73357401-73494462	28.0637	17.636	16.7239
PMPCB	ENSFCAG00000000636	A2:81818679-81833665	58.9557	44.6575	55.9619
DNAJC2	ENSFCAG00000000637	A2:81781355-81818406	27.4375	27.426	30.7932
PSMC2	ENSFCAG00000000638	A2:81765248-81778379	62.3682	68.6096	68.3093
RELN	ENSFCAG00000000639	A2:81165535-81696903	0.0346855	0.0428576	0.0401673
CSN2	ENSFCAG00000000640	B1:149082216-149086170	0	0	0
C5orf46	ENSFCAG00000000642	A1:123771537-123782262	0	0	0
PHF19	ENSFCAG00000000643	D4:81994230-82009337	12.8662	9.10492	15.3596
DSC2	ENSFCAG00000000644	D3:54161639-54189428	0.230846	0.0361761	0.328471
C5	ENSFCAG00000000645	D4:82081682-82170504	0.00640661	0	0
DSC1	ENSFCAG00000000646	D3:54219147-54248442	0.0399868	0.0146472	0.020331
SCN9A	ENSFCAG00000000647	C1:155322476-155421693	0.20176	0.775639	0.352952
CREB3L2	ENSFCAG00000000648	A2:153051799-153167830	19.4971	25.8362	21.3392
CNTN4	ENSFCAG00000000649	A2:43682844-44137143	0.479874	1.25289	1.01787
SENP8	ENSFCAG00000000650	B3:35780004-35780673	3.40125	2.25815	2.36255
GRAMD2	ENSFCAG00000000651	B3:35755715-35762215	16.4004	10.3889	20.1025
IL5RA	ENSFCAG00000000652	A2:44149997-44183379	0	0	0
PKM	ENSFCAG00000000653	B3:35713881-35729188	532.494	677.615	624.774
TMEM202	ENSFCAG00000000656	B3:35549773-35558647	0	0	0.0581001
PLEKHG5	ENSFCAG00000000657	C1:3481902-3507739	0.316196	0.704003	0.694217
NOL9	ENSFCAG00000000658	C1:3532842-3547308	15.0814	22.224	18.1415
TAS1R1	ENSFCAG00000000659	C1:3551797-3560170	0.159839	0.241709	0.314472
ZBTB48	ENSFCAG00000000660	C1:3561188-3567969	4.77414	6.03553	4.31778
THAP3	ENSFCAG00000000662	C1:3596612-3603846	6.45318	6.95383	4.36067
DNAJC11	ENSFCAG00000000663	C1:3604977-3651241	27.5892	29.5728	25.8772
CTIF	ENSFCAG00000000664	D3:69740296-69956633	19.0216	28.8757	15.9901
-	ENSFCAG00000000665	X:116613936-116616458	0	0	0
TRAF3IP2	ENSFCAG00000000667	B2:102728516-102760493	13.532	12.4426	12.1595
TMEM100	ENSFCAG00000000669	E1:32883501-32883906	6.59789	5.6788	10.0089
MID2	ENSFCAG00000000671	X:87169422-87249971	6.52384	7.049	7.46634
IBA57	ENSFCAG00000000672	A1:89400527-89407994	1.54233	2.39418	3.43792
NCMAP	ENSFCAG00000000677	C1:17505254-17511504	0.354814	0	0
-	ENSFCAG00000000678	C1:17537635-17552447	49.6415	45.9867	53.3023
RUNX3	ENSFCAG00000000680	C1:17722453-17749076	0.0696533	0	0.0552708
CEP170B	ENSFCAG00000000681	B3:147546650-147566876	28.5723	32.006	28.1125
CCDC171	ENSFCAG00000000682	D4:43096056-43389121	0.465818	0.477402	0.364527
C14orf79	ENSFCAG00000000683	B3:147618558-147624750	7.54951	2.98129	8.57325
CDCA4	ENSFCAG00000000684	B3:147632184-147632730	7.53481	8.57052	7.134
BRF1	ENSFCAG00000000686	B3:147759256-147809504	6.48938	8.1596	6.38521
MTA1	ENSFCAG00000000688	B3:147927423-147948570	36.6278	37.6385	37.9188
CRIP2	ENSFCAG00000000689	B3:147955657-147957347	121.441	175.518	147.524
-	ENSFCAG00000000692	C2:77706976-77717650	0	0	0
ATP13A5	ENSFCAG00000000693	C2:77632000-77703504	0	0	0
OPA1	ENSFCAG00000000695	C2:74453588-74492451	13.9116	13.7079	13.7486
-	ENSFCAG00000000697	A3:81227314-81227491	0	0	0
ZNF292	ENSFCAG00000000698	B2:80527950-80620242	6.59232	7.47262	5.97706
C12orf29	ENSFCAG00000000699	B4:112544205-112648821	5.97915	6.15021	6.71601
ZBTB8OS	ENSFCAG00000000700	C1:23827977-23843998	26.9458	15.273	25.223
YARS	ENSFCAG00000000704	C1:23938704-24000334	92.3829	91.3044	99.188
TMEM71	ENSFCAG00000000705	F2:73520508-73543545	0	0.0729785	0
PHF20L1	ENSFCAG00000000706	F2:73558042-73640429	12.0052	14.5749	12.4601
RSAD2	ENSFCAG00000000708	A3:137737237-137753371	0.315202	0.0982229	0.0697018
RNF144A	ENSFCAG00000000709	A3:137601524-137646269	20.4937	19.6369	15.5587
WNT7A	ENSFCAG00000000711	A2:54722206-54775523	0.0441761	1.65228	0.897745
SH2D4B	ENSFCAG00000000713	D2:42309605-42398488	0	0	0
CRNKL1	ENSFCAG00000000714	A3:44749302-45052353	20.6465	19.1727	20.1468
CFAP61	ENSFCAG00000000715	A3:44749302-45052353	2.84257	2.18485	2.59868
AGTR1	ENSFCAG00000000717	C2:114609796-114610885	0.780236	0.38923	0.814406
OR52E5	ENSFCAG00000000718	D1:64832277-64833219	0	0	0
LARP4B	ENSFCAG00000000721	B4:804750-903316	14.0981	16.5966	13.8861
DNAJB12	ENSFCAG00000000724	D2:35423472-35438720	28.3976	27.5079	31.6942
MICU1	ENSFCAG00000000725	D2:35448103-35696522	22.3761	19.8949	22.8358
OR10A3	ENSFCAG00000000727	D1:66892865-66893789	0	0	0
TUB	ENSFCAG00000000730	D1:66990391-67052047	1.96204	2.0873	1.78171
RIC3	ENSFCAG00000000732	D1:67060067-67124315	0.0874342	0	0.0672463
ENOX2	ENSFCAG00000000734	X:106617576-106679851	2.31849	1.41033	2.26169
ARL8B	ENSFCAG00000000736	A2:45998971-46045876	80.3479	69.1005	84.0309
EDEM1	ENSFCAG00000000737	A2:46056149-46081371	20.0168	27.4185	22.5819
-	ENSFCAG00000000739	C2:2215996-2228825	0	0	0
TBC1D22B	ENSFCAG00000000741	B2:38477401-38539577	2.57417	3.6006	3.15439
RYR3	ENSFCAG00000000742	B3:70747520-71105947	0	0.0290802	0.00827075
AVEN	ENSFCAG00000000743	B3:71106069-71302529	18.433	26.4218	22.6582
-	ENSFCAG00000000744	C1:23679343-23695142	0.0929866	0	0
AGO1	ENSFCAG00000000746	C1:26685630-26711920	7.8043	8.24238	7.17037
AGO3	ENSFCAG00000000747	C1:26723204-26835165	2.4598	2.76535	2.64653
XYLT1	ENSFCAG00000000748	E3:28988204-29125620	3.82903	3.00121	6.22945
-	ENSFCAG00000000749	D4:18694994-18915016	16.5445	20.6554	12.734
FAM155B	ENSFCAG00000000752	X:57461704-57487956	6.2397	11.408	5.3398
DDX18	ENSFCAG00000000753	C1:120594275-120614172	28.8714	27.284	30.2792
ADAMTSL4	ENSFCAG00000000754	C1:102862240-102869617	9.13265	2.89802	7.26153
RPS6KL1	ENSFCAG00000000756	B3:121321302-121335316	1.06014	0.367503	0.438557
COL4A5	ENSFCAG00000000758	X:87764447-88001859	5.94378	49.399	5.75105
PAQR6	ENSFCAG00000000759	F1:66307823-66843589	5.43862	1.95865	2.01014
IRS4	ENSFCAG00000000760	X:88039092-88042500	0	0.0151414	0
FNDC3B	ENSFCAG00000000762	C2:93075510-93421194	54.1793	72.9454	58.1673
MBD3	ENSFCAG00000000763	A2:917773-921817	61.3354	58.649	64.626
DRD1	ENSFCAG00000000764	A1:174751933-174753274	0	0	0
FOXO1	ENSFCAG00000000765	A1:18617182-18619075	16.1618	9.25647	12.1286
DNAH6	ENSFCAG00000000768	A3:101613233-101761050	1.23304	0.0631488	0.083511
TRABD2A	ENSFCAG00000000770	A3:101763445-101816271	0.0667174	0.514447	0.391375
TM2D1	ENSFCAG00000000772	C1:49588926-49634697	37.2798	38.0198	28.6031
C8orf22	ENSFCAG00000000774	F2:1810210-1812842	0	0	0.752555
AP3M1	ENSFCAG00000000775	D2:37044475-37054353	39.2519	32.9267	36.7517
T	ENSFCAG00000000777	B2:151047064-151055709	0	0	0
CLCN3	ENSFCAG00000000778	B1:59793778-59875205	7.83099	11.0856	9.27417
STRN4	ENSFCAG00000000782	E2:9275762-9499919	38.9334	47.1033	45.6005
LPCAT1	ENSFCAG00000000783	A1:238382853-238411013	18.5686	19.1994	20.5985
APC	ENSFCAG00000000787	A1:172226310-172375249	13.7527	16.3889	14.5098
BMPER	ENSFCAG00000000789	A2:124948374-125197000	1.32498	2.74598	1.31157
TP63	ENSFCAG00000000790	C2:80585026-80810260	0	0	0
P3H2	ENSFCAG00000000791	C2:80381531-80529123	0.877961	5.2348	1.44475
EFEMP1	ENSFCAG00000000792	A3:76783804-76843585	413.934	89.3405	49.8072
CCDC85A	ENSFCAG00000000794	A3:77103788-77305170	0.0744937	0	0.0390358
PINK1	ENSFCAG00000000796	C1:14244005-14252608	20.5998	22.2167	16.1331
FMNL1	ENSFCAG00000000797	E1:45034525-45063375	1.45848	0.424948	1.70271
DDOST	ENSFCAG00000000798	C1:14254363-14261923	233.357	225.79	235.595
KIF17	ENSFCAG00000000799	C1:14264211-14314364	0	0.0122325	0
SH2D5	ENSFCAG00000000800	C1:14315922-14321939	0	0.048612	0
HP1BP3	ENSFCAG00000000801	C1:14335579-14368760	40.8986	44.8418	39.3706
EIF4G3	ENSFCAG00000000802	C1:14386877-14530185	43.895	51.2885	44.7249
DIP2C	ENSFCAG00000000804	B4:278169-503256	21.5845	23.721	18.3589
SERPINB9	ENSFCAG00000000807	B2:25523545-25532290	44.4086	52.1036	30.5393
C4orf46	ENSFCAG00000000808	B1:70166899-70168922	7.80528	3.38859	7.61206
SERPINB6	ENSFCAG00000000810	B2:25425246-25471261	54.2481	31.2213	36.8894
-	ENSFCAG00000000811	B2:79187605-79188009	0	0	0
KIFAP3	ENSFCAG00000000812	F1:12195646-12357447	51.5369	34.8315	38.9089
ADAM12	ENSFCAG00000000813	D2:83442441-83572123	62.2476	69.5179	74.5635
HSP90AA1	ENSFCAG00000000814	B3:145265293-145269489	208.778	202.809	221.9
WDR20	ENSFCAG00000000815	B3:145313796-145381288	5.12569	4.55672	4.27941
MOK	ENSFCAG00000000816	B3:145383290-145445435	1.2471	0.645552	0.752334
IARS	ENSFCAG00000000817	D4:418271-485675	98.5676	110.37	104.024
NOL8	ENSFCAG00000000818	D4:485760-514873	9.43859	9.40644	10.3499
CENPP	ENSFCAG00000000820	D4:536073-791714	4.62186	3.49922	4.95459
OGN	ENSFCAG00000000821	D4:536073-791714	2.35118	0.686135	1.5216
IPPK	ENSFCAG00000000822	D4:536073-791714	12.5476	14.7623	14.8851
PSMD8	ENSFCAG00000000823	E2:14933478-14940942	117.391	132.121	123.605
GGN	ENSFCAG00000000824	E2:14930140-14932901	1.46284	2.98127	2.65946
SPRED3	ENSFCAG00000000825	E2:14921619-14926718	7.80393	8.33747	8.24089
FAM98C	ENSFCAG00000000826	E2:14914033-14916542	19.1505	17.9922	18.6477
RASGRP4	ENSFCAG00000000827	E2:14900648-14912853	0.0249117	0.027317	0
RYR1	ENSFCAG00000000828	E2:14778494-14896082	0.772364	4.30714	3.77057
MAP4K1	ENSFCAG00000000829	E2:14762564-14778397	0.557037	0.41155	0.58423
ACTN1	ENSFCAG00000000832	B3:116046989-116110181	296.489	689.232	346.203
CAPN12	ENSFCAG00000000833	E2:14662869-14744352	0.0223417	0.0735096	0
DOCK2	ENSFCAG00000000834	A1:179108490-179525593	0.0131296	0.0144132	0.13803
FOXI1	ENSFCAG00000000835	A1:179088371-179090988	0	0	0
LCP2	ENSFCAG00000000836	A1:178931823-178976888	0.175474	0.354083	0.270983
KCNMB1	ENSFCAG00000000838	A1:178853660-178860547	4.42063	1.10057	7.74427
CCL2	ENSFCAG00000000840	E1:21523170-21524620	443.327	285.683	473.316
-	ENSFCAG00000000841	E3:20708091-20708790	88.178	71.4653	82.8811
POLR3A	ENSFCAG00000000843	D2:40464176-40518022	5.46389	6.54285	5.97443
NELFCD	ENSFCAG00000000844	A3:4275756-4413068	29.2613	28.0197	31.5653
CTSZ	ENSFCAG00000000845	A3:4266384-4274917	112.899	78.8333	182.423
-	ENSFCAG00000000849	D2:40521164-40522572	1236.52	1260.17	1287.56
ZNF831	ENSFCAG00000000850	A3:4029665-4094478	0.0362792	0.00985947	0.0286148
IFT88	ENSFCAG00000000852	A1:1540752-1668924	20.3909	14.2084	19.3301
N6AMT2	ENSFCAG00000000853	A1:1701994-1709247	19.2882	10.2831	12.3402
XPO4	ENSFCAG00000000855	A1:1735611-1818385	14.8085	16.8293	15.3877
GOLPH3	ENSFCAG00000000857	A1:213458253-213503465	78.5693	72.2691	62.4803
PI3	ENSFCAG00000000858	A3:15517800-15519666	0.990041	0.302424	0.590143
-	ENSFCAG00000000859	A3:15478702-15480299	0	0	0
MLLT4	ENSFCAG00000000864	B2:152259291-152365233	50.661	43.2719	42.2832
C8orf48	ENSFCAG00000000868	B1:23298620-23796121	20.6891	24.032	21.4479
STARD5	ENSFCAG00000000869	B3:2291055-2299721	14.4634	13.733	12.1102
ATP2B4	ENSFCAG00000000870	F1:41627717-41727672	70.5714	87.3793	67.4219
LAX1	ENSFCAG00000000871	F1:41737346-41744452	0	0.0384365	0
ZC3H11A	ENSFCAG00000000872	F1:41777091-41804081	32.516	35.7426	35.3683
SNRPE	ENSFCAG00000000873	F1:41813015-41818382	73.862	79.4718	93.3937
TBC1D9	ENSFCAG00000000874	B1:86332059-86399405	10.3158	10.8528	7.01632
RNF150	ENSFCAG00000000875	B1:85934016-85934698	0.324863	0.355656	0.12802
-	ENSFCAG00000000877	B2:32835680-32838540	137.472	139.46	124.743
NETO2	ENSFCAG00000000879	E2:27582125-27627620	26.6944	31.9508	24.1399
NFIC	ENSFCAG00000000880	A2:2563048-2604522	77.2182	81.8803	88.3838
C19orf71	ENSFCAG00000000882	A2:2670978-2673298	0.887969	0.196983	0.631695
MFSD12	ENSFCAG00000000883	A2:2673996-2678498	37.584	50.2324	46.6212
NFATC1	ENSFCAG00000000884	D3:95003348-95073304	22.7819	20.1526	23.4246
-	ENSFCAG00000000885	B4:119945035-120020890	0	0	0.0115244
NKAIN2	ENSFCAG00000000886	B2:114103451-114623386	0	0	0
2016-09-03	ENSFCAG00000000889	B4:137214630-137226814	0.115119	0.126647	0.206373
SMDT1	ENSFCAG00000000892	B4:137303655-137305432	59.1169	59.5426	42.3577
HSD17B6	ENSFCAG00000000899	B4:85589063-85661675	11.6367	11.3558	10.9628
GBA	ENSFCAG00000000900	F1:67391555-67396631	39.2531	36.5396	32.3915
PFKFB1	ENSFCAG00000000906	X:46831696-46878434	0	0	0
ALAS2	ENSFCAG00000000908	X:46970516-47000582	0	0.0298314	0.0210392
EEF2	ENSFCAG00000000909	A2:2680919-3192762	1351.27	1440.43	1423.84
LY86	ENSFCAG00000000910	B2:21787487-21814769	0	0	0
TMEM98	ENSFCAG00000000912	E1:20375945-20387530	43.3001	21.1736	39.6234
SPACA3	ENSFCAG00000000913	E1:20419310-20427067	0	0	0
NOTCH3	ENSFCAG00000000914	A2:10996745-11033441	21.7226	41.5473	10.189
BRD4	ENSFCAG00000000916	A2:11050331-11190753	43.8485	50.8058	44.9701
BTAF1	ENSFCAG00000000917	D2:54377134-54497271	9.32706	10.94	10.4151
CPEB3	ENSFCAG00000000918	D2:54524744-54715569	0.694788	1.02245	0.573694
ESF1	ENSFCAG00000000919	A3:38935840-39000067	8.30955	8.81562	8.48241
SEL1L2	ENSFCAG00000000921	A3:39054007-39170041	0	0	0
USP47	ENSFCAG00000000922	D1:70357268-70465153	20.5446	28.2697	21.5611
PRKAB1	ENSFCAG00000000923	D3:15908931-15918182	18.6568	18.34	14.3617
-	ENSFCAG00000000924	D3:15926618-15982479	4.03569	2.10402	5.39164
DTX3L	ENSFCAG00000000928	C2:67741708-67750825	4.38948	2.9998	3.78759
PARP15	ENSFCAG00000000929	C2:67777328-67804358	1.19438	0.924484	0.70572
-	ENSFCAG00000000930	C2:67842986-67853165	5.21227	2.18208	4.06132
DIRC2	ENSFCAG00000000932	C2:67949174-68027141	16.2119	12.5359	15.7876
SEMA5B	ENSFCAG00000000934	C2:68059710-68098416	0.0423819	0.0154758	0.0333854
-	ENSFCAG00000000935	D1:103094630-103095605	0	0	0
SF3B5	ENSFCAG00000000936	B2:131941635-131941893	71.1649	57.14	66.281
PDIA5	ENSFCAG00000000938	C2:68216928-68307796	19.8925	30.7139	30.8888
ADCY5	ENSFCAG00000000939	C2:68431825-68579200	0.3691	0.905277	0.144113
MCCC1	ENSFCAG00000000940	C2:86581486-86639091	8.1651	7.79096	7.70453
CARD14	ENSFCAG00000000941	E1:60557620-60580526	0.11158	0	0.135946
SGSH	ENSFCAG00000000942	E1:60582350-60589238	52.1926	46.649	67.3304
SLC26A11	ENSFCAG00000000943	E1:60590313-60609227	6.29028	4.67075	5.33986
-	ENSFCAG00000000945	E1:60674047-60691208	30.9593	23.0084	29.386
RBM28	ENSFCAG00000000946	A2:145012475-145048416	14.2621	14.1501	16.0424
NFATC2	ENSFCAG00000000947	A3:10447516-10528929	0.0178935	0	0.0140663
IMPDH1	ENSFCAG00000000949	A2:145080687-145092296	18.7703	18.8232	21.2562
FAM71F2	ENSFCAG00000000950	A2:145146276-145161094	0.23635	0.200021	0.0422552
OPN1SW	ENSFCAG00000000952	A2:145228678-145231879	0.476856	0.46219	0.374296
CCDC136	ENSFCAG00000000953	A2:145245779-145267751	6.66087	5.26977	2.72613
FLNC	ENSFCAG00000000954	A2:145278608-145304571	201.379	246.799	202.59
IRF5	ENSFCAG00000000956	A2:145370721-145376011	4.23002	2.32808	3.10184
KDM8	ENSFCAG00000000957	E3:21894180-21907646	2.81687	3.10311	2.41559
PASK	ENSFCAG00000000959	C1:220822957-220853893	2.93638	2.05035	2.50651
BEND6	ENSFCAG00000000962	B2:56908325-56948419	20.9524	15.0799	19.4161
CCSAP	ENSFCAG00000000963	D2:21571577-21574284	4.36742	2.45688	4.62673
ZNF114	ENSFCAG00000000964	E2:10984970-10997662	0.0194199	0	0
NUP133	ENSFCAG00000000965	D2:21427923-21484868	14.3803	13.2965	15.2857
EMP3	ENSFCAG00000000967	E2:11035245-11039216	190.944	118.758	241.905
SYNGR4	ENSFCAG00000000969	E2:11061494-11069544	0.472544	0	0.222976
KDELR1	ENSFCAG00000000970	E2:11073101-11079774	144.017	155.653	155.766
PDE3A	ENSFCAG00000000972	B4:55676115-55988732	9.23029	14.7412	11.2325
SLCO1C1	ENSFCAG00000000973	B4:56008923-56065468	0.678613	1.18666	0.821045
TXNRD3	ENSFCAG00000000974	A2:57961309-58029534	3.29601	2.96202	3.10274
CHCHD6	ENSFCAG00000000975	A2:57675325-57927052	22.4277	15.1756	20.1103
PLXNA1	ENSFCAG00000000976	A2:57608954-57652479	25.0297	24.3776	24.4265
MCAM	ENSFCAG00000000977	D1:16570206-16577032	14.4239	79.9282	16.0334
RNF26	ENSFCAG00000000978	D1:16603069-16604392	17.7547	18.7221	17.8553
MFRP	ENSFCAG00000000979	D1:16609592-16614815	0.0277102	0.0304844	0.0218935
USP2	ENSFCAG00000000980	D1:16621225-16644154	0.36568	0.089428	0.333179
-	ENSFCAG00000000982	F2:72950994-72975281	0.0209351	0.0228889	0.0163542
KCNQ3	ENSFCAG00000000984	F2:73048451-73097502	0	0	0
HEXDC	ENSFCAG00000000987	E1:62309051-62334090	2.36618	1.54613	1.54255
OTOP3	ENSFCAG00000000988	E1:56687008-56693046	0	0	0
NNMT	ENSFCAG00000000990	B3:109790852-109808004	306.603	18.421	98.7734
BTNL9	ENSFCAG00000000991	A1:90092444-90117707	0	0	0
C12orf49	ENSFCAG00000000993	D3:13514743-13524167	11.2242	15.155	11.2716
RNFT2	ENSFCAG00000000994	D3:13529828-13596057	2.78654	1.188	2.0881
MYO9B	ENSFCAG00000000996	A2:12363334-12432805	51.1306	64.2076	53.7199
USE1	ENSFCAG00000000997	A2:12435184-12438067	31.094	23.5416	28.467
OCEL1	ENSFCAG00000000998	A2:12439787-12441734	23.4646	21.5239	21.4036
NR2F6	ENSFCAG00000000999	A2:12444679-12452856	5.43882	5.50549	6.82754
USHBP1	ENSFCAG00000001000	A2:12456569-12465726	0.0201078	0	0
DDA1	ENSFCAG00000001001	A2:12498774-12501648	58.1367	46.1629	51.6611
-	ENSFCAG00000001002	A2:12468653-12477206	24.8845	29.244	27.4625
ANKLE1	ENSFCAG00000001003	A2:12477796-12481797	0.493562	0.789799	0.799023
ABHD8	ENSFCAG00000001005	A2:12484041-12489672	10.6246	9.85641	9.41012
ANO8	ENSFCAG00000001006	A2:12504384-12514067	3.46214	3.06818	4.73731
PCOLCE2	ENSFCAG00000001007	C2:119985465-120006702	19.8923	10.3761	15.1665
GTPBP3	ENSFCAG00000001008	A2:12516088-12519584	4.21077	5.65053	4.50563
BST2	ENSFCAG00000001009	A2:12556745-12558671	0.439771	0.580058	1.69887
RAB23	ENSFCAG00000001010	B2:57090802-57115313	52.509	87.7596	62.2237
-	ENSFCAG00000001011	E2:6372733-6373789	1.67012	3.07375	2.03947
-	ENSFCAG00000001014	C1:74297994-74308204	17.0751	14.7471	3.48089
PALMD	ENSFCAG00000001015	C1:83995214-84028318	0	0	0
-	ENSFCAG00000001017	A1:210544138-210570416	1.31096	0.430781	1.35445
SKP2	ENSFCAG00000001018	A1:210443532-210520854	5.32289	3.47577	4.47505
RANBP3L	ENSFCAG00000001019	A1:210345835-210368585	0.0355869	0.0785902	0.0542356
MYOM1	ENSFCAG00000001020	D3:42172043-42305575	0.83553	0.373098	0.215085
NKX2-8	ENSFCAG00000001021	B3:87298172-87299850	0	0	0
PAX9	ENSFCAG00000001024	B3:87377549-87390621	0.100584	0	0
SLC25A21	ENSFCAG00000001025	B3:87392937-87606496	2.62985	2.16874	2.48208
PSMC4	ENSFCAG00000001026	E2:13896833-13905764	53.2454	56.0768	53.7091
C19orf47	ENSFCAG00000001027	E2:13707755-13729527	4.41682	5.19667	6.67647
PLD3	ENSFCAG00000001028	E2:13688957-13696845	57.9286	47.8106	68.3449
HIPK4	ENSFCAG00000001029	E2:13681843-13688245	0	0.0222167	0.0320922
SERTAD3	ENSFCAG00000001031	E2:13646656-13647253	12.7478	16.5715	11.3799
BLVRB	ENSFCAG00000001032	E2:13626522-13642345	35.2528	29.3672	27.7023
SPTBN4	ENSFCAG00000001033	E2:13547746-13622348	0.0357029	0.0110793	0.0520936
-	ENSFCAG00000001034	F1:62824857-62831032	0	0	0
SHKBP1	ENSFCAG00000001035	E2:13536939-13547345	25.936	20.3941	25.4811
LTBP4	ENSFCAG00000001036	E2:13504506-13533699	10.0366	6.84754	5.66908
NAPRT	ENSFCAG00000001037	F2:81569777-81751840	18.0431	15.5309	16.5907
TIGD5	ENSFCAG00000001039	F2:81569777-81751840	16.7889	21.3027	16.8217
PYCRL	ENSFCAG00000001040	F2:81569777-81751840	14.6408	15.5265	12.8692
TSTA3	ENSFCAG00000001041	F2:81569777-81751840	12.8714	14.2161	13.3214
ZNF623	ENSFCAG00000001042	F2:81569777-81751840	3.60848	4.44044	3.88506
SCRIB	ENSFCAG00000001044	F2:81826870-81845212	19.1944	22.7545	21.4393
PUF60	ENSFCAG00000001045	F2:81847350-81862796	72.1452	80.8319	75.4196
JSRP1	ENSFCAG00000001047	A2:1430645-1442561	0.106234	0	0.0413706
DUSP27	ENSFCAG00000001052	F1:9715757-9745459	0	0	0
ASB17	ENSFCAG00000001053	C1:62407699-62428746	0	0	0
CABLES2	ENSFCAG00000001056	A3:1565607-1571974	7.25655	6.86154	8.09577
RBBP8NL	ENSFCAG00000001057	A3:1548375-1556136	0	0	0
GATA5	ENSFCAG00000001058	A3:1510340-1518187	0.189424	0.155313	0.240695
GABRB2	ENSFCAG00000001059	A1:190353664-190583917	0	0	0
-	ENSFCAG00000001060	X:89173714-89175744	20.6307	28.212	23.5623
AMMECR1	ENSFCAG00000001061	X:89200886-89219214	9.17349	19.7256	6.87136
CDH3	ENSFCAG00000001062	E2:46241811-46259839	1.82616	8.1142	2.49489
EPGN	ENSFCAG00000001063	B1:145526403-145532573	0	0	0
CLOCK	ENSFCAG00000001064	B1:161025986-161092959	6.40282	7.48812	7.54746
CLDN1	ENSFCAG00000001065	C2:80242051-80255679	0.21509	0.236311	0.501303
TEX33	ENSFCAG00000001068	B4:133135150-133148642	0	0.345226	0.0613034
TST	ENSFCAG00000001069	B4:133151232-133162623	9.53321	33.8446	5.97168
KCTD17	ENSFCAG00000001070	B4:133183139-133191290	36.9789	37.993	41.8098
TNS1	ENSFCAG00000001073	C1:201842226-201926274	82.8535	175.505	84.3654
CDKL5	ENSFCAG00000001075	X:14404531-14527576	2.8854	3.17977	2.60482
PSORS1C2	ENSFCAG00000001076	B2:32546665-32548268	3.14172	2.07473	3.56899
TCF19	ENSFCAG00000001077	B2:32565581-32569203	17.1908	7.09693	19.4587
-	ENSFCAG00000001078	B2:32571099-32576341	0	0	0
ETV7	ENSFCAG00000001082	B2:37656754-37665447	0	0	0
-	ENSFCAG00000001084	B2:37854227-37858536	59.9973	64.0131	66.6249
CPNE5	ENSFCAG00000001089	B2:37983418-38077384	0.027715	0	0
PPIL1	ENSFCAG00000001090	B2:38091949-38110903	45.9063	44.3823	52.8214
C6orf89	ENSFCAG00000001091	B2:38134423-38157949	49.7138	41.4845	35.3436
MTCH1	ENSFCAG00000001093	B2:38205853-38220632	150.686	151.817	153.908
FGD2	ENSFCAG00000001094	B2:38242474-38266613	0.793224	0.586547	1.21312
SLC35C2	ENSFCAG00000001100	A3:14587415-14595501	33.6419	39.8369	37.6359
IRGC	ENSFCAG00000001103	E2:12037087-12042872	0.0725752	0	0
SMG9	ENSFCAG00000001104	E2:12018504-12035206	11.9557	17.4757	16.6856
KCNN4	ENSFCAG00000001105	E2:11995577-12006769	1.21901	3.12307	1.59204
DNAJB5	ENSFCAG00000001106	D4:58980609-58990861	2.74568	7.79465	1.73501
SETD3	ENSFCAG00000001108	B3:142971662-143034907	19.7105	26.4046	17.3169
FAM216B	ENSFCAG00000001111	A1:27673945-27678799	0	0	0
VCP	ENSFCAG00000001112	D4:59030777-59044106	128.503	162.078	134.756
NUP54	ENSFCAG00000001118	B1:143855390-143886525	17.6055	16.0414	17.9689
PIGO	ENSFCAG00000001120	D4:59060874-59067390	16.4483	15.4025	14.8879
SCARB2	ENSFCAG00000001121	B1:143774220-143845791	40.7044	19.2427	32.2682
-	ENSFCAG00000001122	B4:132513020-132517417	0	0	0
STOML2	ENSFCAG00000001123	D4:59072123-59075207	59.6833	46.8631	48.9654
MYH9	ENSFCAG00000001124	B4:132536440-132626554	491.7	658.233	540.483
FAM214B	ENSFCAG00000001125	D4:59076287-59088435	9.2781	11.0893	8.65044
CRTAM	ENSFCAG00000001126	D1:19758645-19785805	0	0	0
TXN2	ENSFCAG00000001127	B4:132691864-132703834	30.881	32.0633	27.6202
FOXRED2	ENSFCAG00000001128	B4:132719342-132735355	5.67864	2.73967	5.16584
C11orf63	ENSFCAG00000001129	D1:19809003-19869527	0	0	0
S100Z	ENSFCAG00000001130	A1:141489509-141493462	0.273513	0.619784	0
EIF3D	ENSFCAG00000001131	B4:132738996-132750096	196.984	203.839	186.772
HSPA8	ENSFCAG00000001132	D1:19961602-19965175	853.654	786.363	975.703
CLMP	ENSFCAG00000001133	D1:19971716-19993263	103.744	118.257	141.34
MCTP2	ENSFCAG00000001135	B3:12957229-13145851	1.10073	3.59729	1.54743
PLCB2	ENSFCAG00000001138	B3:64620646-64630188	0.063655	0	0
CD1C	ENSFCAG00000001141	F1:65284710-65287394	0	0	0
WFDC11	ENSFCAG00000001143	A3:15156684-15158554	0	0	0
C12orf56	ENSFCAG00000001146	B4:92014152-92096332	2.59901	0.476929	1.17858
BCL9L	ENSFCAG00000001147	D1:16245359-16256050	30.5146	25.0648	25.6602
CCDC84	ENSFCAG00000001150	D1:16322155-16330987	4.89887	4.7385	4.72091
-	ENSFCAG00000001151	D1:16322155-16330987	351.011	355.723	425.529
TRAPPC4	ENSFCAG00000001152	D1:16331705-16334417	24.9327	25.5784	21.2656
SLC37A4	ENSFCAG00000001153	D1:16336110-16340797	4.51528	3.57233	4.83941
HYOU1	ENSFCAG00000001154	D1:16356717-16366801	71.3547	108.929	89.2489
VPS11	ENSFCAG00000001156	D1:16375756-16385623	15.2753	13.189	13.9528
RILPL2	ENSFCAG00000001158	D3:6383270-6399861	9.6282	6.78992	7.26276
SNRNP35	ENSFCAG00000001159	D3:6357666-6358407	12.0649	13.2128	14.1712
HMBS	ENSFCAG00000001160	D1:16387784-16395224	19.0105	19.624	20.3011
RILPL1	ENSFCAG00000001161	D3:6316769-6353975	34.0649	36.901	31.4762
DPAGT1	ENSFCAG00000001163	D1:16396524-16403033	21.2225	23.0465	29.1575
C2CD2L	ENSFCAG00000001164	D1:16409935-16416656	3.51898	5.59147	4.9819
HINFP	ENSFCAG00000001165	D1:16425462-16430894	10.1158	9.45474	9.57015
ABCG4	ENSFCAG00000001166	D1:16441318-16452494	0	0	0.0403639
NLRX1	ENSFCAG00000001167	D1:16459533-16468894	27.3942	21.7882	18.9324
PDZD3	ENSFCAG00000001168	D1:16469923-16473643	0.74451	0.856375	0.748428
CCDC153	ENSFCAG00000001169	D1:16475303-16479394	0	0	0
ASTE1	ENSFCAG00000001170	C2:130670190-130705012	1.61262	1.21869	1.12835
NEK11	ENSFCAG00000001171	C2:130553386-130667448	1.31868	0.783718	1.19456
ARFRP1	ENSFCAG00000001172	A3:585577-590813	36.6361	38.8355	33.941
ZGPAT	ENSFCAG00000001173	A3:568222-584529	27.8402	23.8457	24.1294
-	ENSFCAG00000001174	A3:565120-566335	0	0	0
ZBTB46	ENSFCAG00000001175	A3:522992-558332	2.35362	5.83793	3.76262
ABHD16B	ENSFCAG00000001176	A3:470660-471197	0.964288	1.04679	0.653904
TPD52L2	ENSFCAG00000001177	A3:450960-468552	40.329	49.6513	43.7008
DNAJC5	ENSFCAG00000001178	A3:412334-422981	25.0445	24.1857	27.0382
UCKL1	ENSFCAG00000001179	A3:396572-403129	12.4904	12.0558	13.0356
ZNF512B	ENSFCAG00000001181	A3:379169-386662	7.89738	9.57611	8.12533
SAMD10	ENSFCAG00000001182	A3:372027-375269	0.104483	0	0
PRPF6	ENSFCAG00000001183	A3:321135-368026	21.4797	24.2077	22.9795
RGS19	ENSFCAG00000001186	A3:288873-300886	1.72465	1.31682	1.75651
OPRL1	ENSFCAG00000001187	A3:268126-274873	0.0923097	0.101045	0.218661
NPBWR2	ENSFCAG00000001188	A3:261486-262542	0	0	0
MYT1	ENSFCAG00000001189	A3:155075-195410	0	0	0
NTNG1	ENSFCAG00000001190	C1:90136099-90462977	0.279974	1.16516	0
VAV3	ENSFCAG00000001191	C1:90572483-90923662	5.34158	1.52697	3.80953
PCMTD1	ENSFCAG00000001192	F2:4374368-4438353	15.9025	16.7432	12.724
SLC25A24	ENSFCAG00000001193	C1:91105533-91157018	17.9687	15.7186	19.9263
-	ENSFCAG00000001194	D1:102743740-102744691	0	0	0
OR10A7	ENSFCAG00000001196	B4:83991664-83992615	0	0	0
LRRN4	ENSFCAG00000001198	A3:32004142-32012191	0.158846	2.81913	0.374669
PTP4A1	ENSFCAG00000001199	B2:59965033-59968789	105.313	115.704	91.7721
CES3	ENSFCAG00000001200	E2:44792826-44803916	0.0289414	0	0
BOD1L1	ENSFCAG00000001201	B1:195674032-195720613	6.36255	7.21153	6.78477
RUFY1	ENSFCAG00000001202	A1:91560823-91620239	11.9356	8.44346	9.57818
TMOD1	ENSFCAG00000001203	D4:62222713-62287076	2.1464	1.92094	0.419091
HNRNPH1	ENSFCAG00000001204	A1:91549337-91558073	112.389	137.943	132.044
TSTD2	ENSFCAG00000001205	D4:62289790-62308992	12.7069	15.7091	13.4667
NCBP1	ENSFCAG00000001206	D4:62311216-62349670	27.134	25.4087	28.0404
NANS	ENSFCAG00000001207	D4:62652994-62674486	45.5015	50.6187	49.3499
LGALSL	ENSFCAG00000001209	A3:84410554-84416034	0.979302	4.76372	2.36096
SLC25A6	ENSFCAG00000001211	X:802774-805108	934.005	1002.05	979.485
FSHR	ENSFCAG00000001215	A3:70530271-70701233	0	0	0
EHMT1	ENSFCAG00000001216	D4:95712798-95798951	14.7768	17.6758	14.9092
CACNA1B	ENSFCAG00000001217	D4:95821118-96011689	0.901582	1.70956	1.41644
PTBP1	ENSFCAG00000001219	A2:346844-357706	123.232	118.626	131.623
MISP	ENSFCAG00000001220	A2:315014-318668	0.28008	0.0822444	0.140857
-	ENSFCAG00000001221	X:44513561-44519553	2.11852	4.09599	3.47433
TMEM40	ENSFCAG00000001223	A2:53009696-53013913	0	0	0
COL13A1	ENSFCAG00000001224	D2:33304052-33383453	0.0495669	0.0877297	0.0505575
H2AFY2	ENSFCAG00000001225	D2:33452735-33490610	0.268728	0.296272	0
AIFM2	ENSFCAG00000001226	D2:33491170-33502365	9.10851	11.7446	8.63146
NPFFR1	ENSFCAG00000001227	D2:33604887-33608539	0	0	0
LRRC20	ENSFCAG00000001228	D2:33652808-33747365	0.852377	0.626382	0.795648
NODAL	ENSFCAG00000001230	D2:33753709-34015869	0.333364	0.305338	0.700428
PALD1	ENSFCAG00000001231	D2:33753709-34015869	0.0349497	0.0509922	0.100777
ADAMTS14	ENSFCAG00000001232	D2:33753709-34015869	1.25254	4.47831	1.17636
TBATA	ENSFCAG00000001233	D2:34039706-34050575	0	0	0
SGPL1	ENSFCAG00000001234	D2:34068450-34124063	8.09269	6.83888	6.67964
PCBD1	ENSFCAG00000001235	D2:34129584-34131031	4.19751	0.78988	0.811977
LDB1	ENSFCAG00000001236	D2:62605638-62609135	36.3878	47.808	38.9919
PPRC1	ENSFCAG00000001238	D2:62629252-62644738	18.0908	22.1007	21.0397
NOLC1	ENSFCAG00000001239	D2:62644803-62655095	19.9672	17.7104	23.4868
GPR101	ENSFCAG00000001240	X:111611037-111612531	0	0	0
GBF1	ENSFCAG00000001241	D2:62719795-62839498	25.7115	27.1905	27.5615
NFKB2	ENSFCAG00000001242	D2:62846109-62868177	12.4266	19.4911	17.4245
PSD	ENSFCAG00000001243	D2:62846109-62868177	1.40039	1.32796	1.57506
FBXL15	ENSFCAG00000001244	D2:62870503-62872407	5.20859	4.43006	5.08989
CUEDC2	ENSFCAG00000001245	D2:62872661-62874657	44.0032	42.676	41.9343
ACTR1A	ENSFCAG00000001248	D2:62912556-62928740	88.8507	86.0459	89.5989
-	ENSFCAG00000001249	D2:62966740-63046771	5.80562	6.28315	5.26942
ARL3	ENSFCAG00000001251	D2:63083027-63114427	29.8325	38.2156	34.5619
CYP17A1	ENSFCAG00000001254	D2:63216583-63222490	0	0	0
SH3GL3	ENSFCAG00000001256	B3:3375296-3426457	0.185807	1.22762	0.355016
ADAMTSL3	ENSFCAG00000001257	B3:3016271-3355956	19.1447	31.2047	19.2339
RHAG	ENSFCAG00000001258	B2:49946988-49969629	0	0	0
CCL5	ENSFCAG00000001259	E1:22708389-22714877	0	0	0
CD37	ENSFCAG00000001261	E2:8088667-8120627	7.2919	7.69642	5.02779
UGGT1	ENSFCAG00000001264	C1:110955319-111064376	49.1886	51.0707	55.4225
TTC27	ENSFCAG00000001265	A3:115871410-116059875	14.7951	12.9592	14.2744
LSM11	ENSFCAG00000001266	A1:181424522-181428001	1.41394	2.51716	1.70484
CLINT1	ENSFCAG00000001267	A1:181459619-181517849	38.5115	54.6821	42.8667
PURA	ENSFCAG00000001269	A1:116441995-116844915	18.2986	17.1969	18.0214
CYSTM1	ENSFCAG00000001271	A1:116920048-116964005	53.8885	52.0701	45.8853
PFDN1	ENSFCAG00000001272	A1:116965786-117037335	69.7385	78.9931	76.3496
HBEGF	ENSFCAG00000001273	A1:117063920-117074105	2.15605	5.91656	4.18258
SLC4A9	ENSFCAG00000001274	A1:117087850-117099497	0	0.0201023	0
-	ENSFCAG00000001275	A1:117127439-117274394	14.4339	14.6457	14.5067
APBB3	ENSFCAG00000001276	A1:117275528-117281018	0.966433	0.989265	1.05015
SLC35A4	ENSFCAG00000001277	A1:117283841-117284816	38.2587	40.5146	40.4791
CD14	ENSFCAG00000001278	A1:117311205-117312333	0.877886	0	0.129274
IK	ENSFCAG00000001279	A1:117325315-117335480	47.9837	46.2788	44.0176
TMCO6	ENSFCAG00000001280	A1:117316549-117322265	4.04781	2.39426	3.10333
NDUFA2	ENSFCAG00000001282	A1:117322927-117325000	120.616	123.359	112.724
FBXO45	ENSFCAG00000001284	C2:71790862-71803541	2.13868	2.80598	3.03323
DND1	ENSFCAG00000001285	A1:117339750-117346522	2.83897	3.16864	2.63195
HARS	ENSFCAG00000001286	A1:117347248-117367965	46.7382	49.0522	46.8041
TM4SF18	ENSFCAG00000001287	C2:114086941-114111192	0.349535	0.128761	0
HARS2	ENSFCAG00000001288	A1:117347248-117367965	3.45528	4.03477	2.80507
ZMAT2	ENSFCAG00000001289	A1:117368559-117373405	35.0317	32.9062	38.8108
S100A8	ENSFCAG00000001290	F1:68631117-68631485	0	0	0
SLC35F4	ENSFCAG00000001291	B3:106075989-106107841	1.38218	4.61451	4.73989
ACO1	ENSFCAG00000001293	D4:57070572-57149173	30.1867	25.0071	32.7659
DDX58	ENSFCAG00000001294	D4:57070572-57149173	8.10691	5.30767	6.93153
NDUFB6	ENSFCAG00000001297	D4:57172228-57184457	68.2444	81.5658	59.5091
CRTC2	ENSFCAG00000001298	F1:68241561-68250100	16.515	16.7675	17.4777
PNPO	ENSFCAG00000001300	E1:39319736-39324408	1.05244	1.86539	1.08557
CORO1A	ENSFCAG00000001301	E3:20667181-20670878	1.02506	0.564465	0.779854
-	ENSFCAG00000001305	B2:3502262-3513205	0.18679	0.0586453	0.227277
RARRES3	ENSFCAG00000001307	D1:108427907-108429481	2.46329	2.47222	1.8943
PLA2G16	ENSFCAG00000001309	D1:108452811-108468844	30.3603	45.4414	28.545
SMTN	ENSFCAG00000001312	D3:22178988-22201262	44.7248	112.252	56.292
PSMD5	ENSFCAG00000001313	D4:81942871-81966051	34.6745	34.5697	33.2507
-	ENSFCAG00000001314	D3:22201769-22204009	218.322	261.257	249.875
INPP5J	ENSFCAG00000001315	D3:22211930-22220673	0.104976	0.0993791	0.129801
PLA2G3	ENSFCAG00000001316	D3:22221914-22226457	1.52955	2.74235	2.13727
RNF185	ENSFCAG00000001317	D3:22265117-22276259	19.4715	13.4764	15.7917
LIMK2	ENSFCAG00000001318	D3:22283573-22341006	15.5747	23.7535	15.4886
PIK3IP1	ENSFCAG00000001319	D3:22345144-22355032	0.404544	0.817552	0.524469
-	ENSFCAG00000001322	D3:22431698-22455401	36.839	41.4042	35.0636
EIF4ENIF1	ENSFCAG00000001323	D3:22460677-22503798	13.1876	16.5125	14.5514
SFI1	ENSFCAG00000001324	D3:22533262-22620301	7.63774	7.53122	7.15783
RGS7	ENSFCAG00000001325	F1:8498011-8646949	15.0852	9.30881	8.85721
PISD	ENSFCAG00000001326	D3:22533262-22620301	22.589	18.9247	23.1554
DEPDC5	ENSFCAG00000001328	D3:22744083-22869097	2.27049	3.00625	2.85993
YWHAG	ENSFCAG00000001330	E3:8956186-8957300	153.636	162.837	153.517
SLC5A1	ENSFCAG00000001331	D3:22993824-23063679	0.108454	0	0.231191
COL9A3	ENSFCAG00000001332	A3:1240195-1256597	3.91178	3.47685	1.58782
ZNF648	ENSFCAG00000001334	F1:25779881-25781588	0.0285555	0	0
RHOF	ENSFCAG00000001335	D3:7656758-7667571	2.04117	1.67816	2.46666
-	ENSFCAG00000001336	D1:63339709-63340663	0	0	0
TRIM21	ENSFCAG00000001338	D1:62739792-62745718	4.89749	1.71627	4.01397
ADAR	ENSFCAG00000001341	F1:67828789-67845770	60.0025	55.248	58.1938
PMVK	ENSFCAG00000001343	F1:67619752-67623462	24.6915	30.72	21.7506
PBXIP1	ENSFCAG00000001344	F1:67599047-67605443	27.9974	65.5389	23.4253
PYGO2	ENSFCAG00000001345	F1:67590860-67593925	43.6187	44.373	45.2327
SHC1	ENSFCAG00000001346	F1:67585003-67590218	95.2236	85.8613	112.749
CKS1B	ENSFCAG00000001347	F1:67578897-67581658	14.4136	6.97736	14.623
-	ENSFCAG00000001348	B2:34330963-34370343	0.0395331	0.305372	0.0308041
SLC5A7	ENSFCAG00000001350	A3:55286248-55309114	0	0	0
CYP46A1	ENSFCAG00000001352	B3:143222892-143247887	0.153251	0.236244	0.238295
SLC16A13	ENSFCAG00000001353	E1:1969224-1971927	4.39288	2.58854	3.28619
SLC16A11	ENSFCAG00000001354	E1:1972929-1974888	0.837389	0.171714	1.37563
ALOX12	ENSFCAG00000001355	E1:1869977-1948966	0.0230134	0.0252691	0.0361862
BCL6B	ENSFCAG00000001356	E1:1961590-1964547	0.199136	0.174498	0.125094
UACA	ENSFCAG00000001357	B3:37044666-37092217	22.1143	24.8778	26.6392
-	ENSFCAG00000001358	E1:1953178-1955212	78.6445	60.2374	72.7263
CLEC10A	ENSFCAG00000001359	E1:1994380-1996863	0	0	0
ASGR1	ENSFCAG00000001360	E1:2012449-2018802	0	0	0
LARP6	ENSFCAG00000001361	B3:36935628-36941707	84.4995	75.192	79.2872
VNN1	ENSFCAG00000001364	B2:121899148-121927740	4.64271	0.828184	16.2646
CLEC6A	ENSFCAG00000001365	B4:44859963-44877129	0	0	0
-	ENSFCAG00000001367	A1:117675940-117678295	0.927494	1.38432	1.32963
PRSS58	ENSFCAG00000001368	A2:156615069-156620898	0	0	0
-	ENSFCAG00000001369	B1:198112037-198154100	4.93413	7.99293	6.24064
MLH1	ENSFCAG00000001371	C2:152406875-152552419	6.60319	6.72424	7.0781
NOX5	ENSFCAG00000001372	B3:38511484-38538889	0	0	0
LRRFIP2	ENSFCAG00000001374	C2:152406875-152552419	10.8463	11.4051	11.0493
OMA1	ENSFCAG00000001377	C1:46661293-46739808	3.8211	1.87297	2.8552
2016-03-05	ENSFCAG00000001378	D2:54716525-54770244	35.9989	50.5118	36.387
GNRHR	ENSFCAG00000001379	B1:150158021-150179569	0.119307	0.132223	0.137636
SLC5A2	ENSFCAG00000001380	E3:19244840-19264791	3.00662	2.30782	2.43162
VPS35	ENSFCAG00000001383	E2:27157675-27180483	92.5459	81.5012	94.3185
C14orf28	ENSFCAG00000001384	B3:94758659-94770982	0.332114	0.565143	0.227259
MEMO1	ENSFCAG00000001385	A3:116605559-116668999	60.2669	66.7744	57.9738
MYLK3	ENSFCAG00000001388	E2:27218713-27252634	0	0.0143994	0
JADE3	ENSFCAG00000001392	X:40440624-40574288	3.22513	2.6886	1.97732
RBM10	ENSFCAG00000001395	X:40639277-40666739	21.0167	19.1683	20.2947
UBA1	ENSFCAG00000001396	X:40682328-40697503	162.99	215.675	162.064
CDK16	ENSFCAG00000001398	X:40705323-40712679	51.0241	69.2627	52.0967
USP11	ENSFCAG00000001399	X:40715534-40731998	18.9317	27.0493	17.1995
-	ENSFCAG00000001402	X:96855127-96855494	1.18447	0.52641	0.550028
GDPD1	ENSFCAG00000001406	E1:29767257-29816382	0.491891	0.341555	0.419952
DHX40	ENSFCAG00000001409	E1:29480275-29528592	19.896	20.3357	18.3408
AK5	ENSFCAG00000001412	C1:63693385-63952016	0.340246	0	0.179651
PLPPR1	ENSFCAG00000001413	D4:65419022-65464477	0	0	0.0458604
BAAT	ENSFCAG00000001414	D4:65499160-65507234	0.684441	0	0.588935
ZZZ3	ENSFCAG00000001415	C1:63958728-64011984	17.5363	18.7815	17.3076
ALDOB	ENSFCAG00000001417	D4:65545696-65554748	0.372613	0.360454	0.217647
TMEM246	ENSFCAG00000001418	D4:65594975-65596187	30.8745	20.8175	26.214
RNF20	ENSFCAG00000001419	D4:65637794-65663280	9.49137	7.537	10.3764
PDLIM1	ENSFCAG00000001420	D2:56813837-56845297	56.0627	89.1493	28.3573
SORBS1	ENSFCAG00000001421	D2:56883137-57111638	2.27746	13.0925	1.18464
ALDH18A1	ENSFCAG00000001422	D2:57148441-57187589	45.4444	69.8216	61.3575
-	ENSFCAG00000001427	A1:4411370-4492266	0.649418	6.78365	1.43595
CLEC9A	ENSFCAG00000001428	B4:46549360-46563669	0.0782796	0.346671	0
CLEC1A	ENSFCAG00000001429	B4:46570020-46591621	4.94493	9.79577	3.58734
OLR1	ENSFCAG00000001430	B4:46643675-46653477	0.136136	0.0749694	0
KCNK10	ENSFCAG00000001433	B3:133137493-133207371	0	0	0
METTL22	ENSFCAG00000001434	E3:35893672-35914132	24.6924	27.1911	16.7384
-	ENSFCAG00000001436	F2:19859461-19876411	0	0	0
CAPN1	ENSFCAG00000001438	D1:109791075-109815980	93.0421	85.4197	89.2938
-	ENSFCAG00000001439	D1:109818454-109838908	0.033829	0	0.0266603
POLA2	ENSFCAG00000001440	D1:109878410-109905003	13.3536	14.4516	13.7163
CDC42EP2	ENSFCAG00000001441	D1:109921760-109922405	33.2986	17.683	22.6426
-	ENSFCAG00000001442	D1:110028284-110028611	0	1.16279	0
FRMD8	ENSFCAG00000001443	D1:109969396-109988861	13.9599	11.0318	11.715
ARFGEF2	ENSFCAG00000001445	A3:12451578-12539938	16.0198	15.3014	14.9238
CSE1L	ENSFCAG00000001446	A3:12340013-12440742	60.851	51.4387	63.1023
STAU1	ENSFCAG00000001447	A3:12340013-12440742	20.7698	20.6509	17.9542
DDX27	ENSFCAG00000001448	A3:12272570-12291074	25.4585	27.0492	27.9958
ZNFX1	ENSFCAG00000001449	A3:12245452-12269969	34.052	37.4497	35.2699
MED9	ENSFCAG00000001450	E1:11773803-11786466	22.2439	24.2167	31.5521
NAGA	ENSFCAG00000001451	B4:137288870-137296107	24.2195	20.1346	25.3925
SLC39A14	ENSFCAG00000001452	B1:33886154-33930102	16.3103	17.3511	17.4566
-	ENSFCAG00000001453	C1:8083861-8131753	0.431067	0.118223	0.297552
LMX1B	ENSFCAG00000001454	D4:87328293-87407290	0.476524	0	0.947874
-	ENSFCAG00000001457	C1:8170627-8172291	1.74766	4.71024	0.882857
C12orf45	ENSFCAG00000001458	B4:127099195-127105964	11.503	13.0003	11.9665
ALDH1L2	ENSFCAG00000001459	B4:127115271-127169350	121.751	142.505	133.637
KIAA1033	ENSFCAG00000001460	B4:127195986-127249794	20.1132	19.6917	18.2777
APPL2	ENSFCAG00000001461	B4:127256700-127303698	18.8026	14.8149	16.0035
COL14A1	ENSFCAG00000001462	F2:63186142-63384125	5.17909	0.585634	1.58194
MRPL13	ENSFCAG00000001463	F2:63407611-63460577	43.3758	47.3757	39.7372
MRPS22	ENSFCAG00000001464	C2:123029235-123081653	30.0032	34.0619	26.0741
COPB2	ENSFCAG00000001465	C2:123029235-123081653	94.972	126.182	105.334
L3MBTL3	ENSFCAG00000001466	B2:119524471-119626899	2.82307	3.50591	2.16759
RBP2	ENSFCAG00000001467	C2:122936919-122959556	0	0	0
SAMD3	ENSFCAG00000001468	B2:119629589-119685599	0	0	0
ZNF202	ENSFCAG00000001471	D1:20556107-20561380	1.53288	2.3549	2.32502
TMED10	ENSFCAG00000001472	B3:121521570-121559958	103.478	114.234	131.559
PRND	ENSFCAG00000001473	A3:30964608-30965145	0	0	0
GSR	ENSFCAG00000001476	B1:26753241-26782436	42.7867	20.7468	33.391
CDC42SE2	ENSFCAG00000001478	A1:109093585-109097618	22.5926	29.4281	37.1493
-	ENSFCAG00000001479	A1:109124576-109311109	7.25756	8.04259	8.40835
FAM129B	ENSFCAG00000001480	D4:88085249-88137151	76.7719	101.332	94.05
STXBP1	ENSFCAG00000001481	D4:88207897-88238208	11.7443	10.4164	12.1104
CFAP157	ENSFCAG00000001482	D4:88251006-88259311	0.109333	0.0954638	0.0170474
PTRH1	ENSFCAG00000001483	D4:88251006-88259311	17.1176	17.2158	20.5256
SH2D3C	ENSFCAG00000001486	D4:88278427-88308100	0.251801	0.968963	0.517019
FPGS	ENSFCAG00000001488	D4:88331734-88341167	15.5527	16.4612	15.9726
ENG	ENSFCAG00000001489	D4:88341583-88371990	72.5452	117.017	73.8769
ST6GALNAC6	ENSFCAG00000001491	D4:88397381-88406349	46.6003	40.6226	48.7414
PIP5KL1	ENSFCAG00000001492	D4:88428792-88436348	1.08704	0.446899	0.640087
FAM102A	ENSFCAG00000001493	D4:88443853-88479060	16.0493	3.78073	12.2288
NAIF1	ENSFCAG00000001494	D4:88530143-88532820	1.84255	3.16413	2.44764
SLC25A25	ENSFCAG00000001495	D4:88557793-88568375	22.4932	19.8039	17.0057
-	ENSFCAG00000001496	D4:88654910-88657790	0	0	0
ATP5G2	ENSFCAG00000001502	B4:82259286-82456402	349.783	381.14	370.159
SLC1A4	ENSFCAG00000001506	A3:84852242-84871854	44.4037	49.088	37.8273
UPB1	ENSFCAG00000001510	D3:24521094-24549326	0	0	0
GUCD1	ENSFCAG00000001511	D3:24570111-24575583	33.2042	29.804	26.1896
SNRPD3	ENSFCAG00000001512	D3:24580417-24594251	40.0993	36.3309	38.0631
LRRC75B	ENSFCAG00000001513	D3:24613058-24616788	19.6337	7.07418	9.69327
-	ENSFCAG00000001514	D3:24632523-24644102	0.276497	0.228152	0.0542053
PNLIP	ENSFCAG00000001515	D2:75224999-75244205	0	0	0
PNLIPRP2	ENSFCAG00000001516	D2:75279482-75302263	0	0	0
HSPA12A	ENSFCAG00000001517	D2:75325981-75358804	9.68318	6.03436	5.80762
ENO4	ENSFCAG00000001518	D2:75495621-75518226	0	0	0.0305762
AMIGO2	ENSFCAG00000001520	B4:76668925-76670491	8.88829	62.8407	7.43224
TEAD2	ENSFCAG00000001523	E2:8088667-8120627	24.0155	28.1068	19.7657
CCDC155	ENSFCAG00000001524	E2:8051854-8073038	0.104223	0.136616	0.275629
PTH2	ENSFCAG00000001525	E2:8047225-8048047	0	0	0
RPF2	ENSFCAG00000001527	B2:102189180-102222663	20.233	22.1183	21.0477
PPEF1	ENSFCAG00000001528	X:14578696-14686871	0.0171887	0.0189525	0.0656152
PHKA2	ENSFCAG00000001529	X:14720894-14791588	1.78238	1.89075	2.56134
NSD1	ENSFCAG00000001531	A1:173264732-173402532	15.3011	16.0251	16.1387
PRELID1	ENSFCAG00000001532	A1:173253463-173256269	249.828	228.789	251.339
MXD3	ENSFCAG00000001533	A1:173248618-173252414	3.33314	1.9444	4.53703
RGS14	ENSFCAG00000001535	A1:173187425-173200389	0	0	0
SLC34A1	ENSFCAG00000001536	A1:173163581-173174622	0	0	0
PFN3	ENSFCAG00000001537	A1:173161705-173162119	0	0	0
F12	ENSFCAG00000001538	A1:173152215-173160270	0.0320595	0.096892	0.0253809
GRK6	ENSFCAG00000001539	A1:173128149-173142995	12.865	17.4154	13.225
DBN1	ENSFCAG00000001540	A1:173104041-173117282	184.089	203.329	167.258
DDX41	ENSFCAG00000001542	A1:173057701-173063861	16.4555	10.6374	17.0049
FAM193B	ENSFCAG00000001543	A1:173024127-173056264	8.77103	10.4803	8.8345
C7orf50	ENSFCAG00000001545	E3:714753-725231	88.31	85.2756	80.4654
CYP4V2	ENSFCAG00000001547	B1:15431170-15447509	9.39703	5.71899	9.92886
F11	ENSFCAG00000001549	B1:15489530-15506376	0	0	0
CAMK4	ENSFCAG00000001551	A1:171033226-171248466	0.125283	0.301571	0.499955
APP	ENSFCAG00000001556	C2:18415964-18681812	202.757	294.616	217.518
-	ENSFCAG00000001558	X:44797516-44799400	3.54636	3.04307	3.84413
SEC31A	ENSFCAG00000001563	B1:137765638-137824936	79.3804	100.046	88.6044
ADAMTS9	ENSFCAG00000001564	A2:31564784-31725371	0.392635	0.171826	0.293652
PRKCG	ENSFCAG00000001566	E2:3907934-3925677	0.193081	0.516633	0.0670948
CACNG7	ENSFCAG00000001567	E2:3886233-3902334	0	0.354728	0
SMARCA2	ENSFCAG00000001568	D4:9036491-9202168	32.927	32.4733	26.1313
INPP1	ENSFCAG00000001570	C1:177127041-177136804	9.5784	17.723	10.3092
CCNB1	ENSFCAG00000001572	A1:136303585-136311564	40.3779	24.6092	51.2913
ENPP6	ENSFCAG00000001574	B1:13509686-13617770	0	0	0.102594
SIN3B	ENSFCAG00000001576	A2:12161542-12195472	17.4133	24.599	15.3126
F2RL3	ENSFCAG00000001577	A2:12202971-12203890	0	0	0
CPAMD8	ENSFCAG00000001578	A2:12209340-12289239	1.62371	1.93569	1.88385
HAUS8	ENSFCAG00000001579	A2:12325064-12343737	15.4087	8.9086	13.1226
NUP58	ENSFCAG00000001580	A1:4982989-5019337	14.0749	20.3084	17.4136
ATP8A2	ENSFCAG00000001581	A1:5145786-5657786	0	0	0
SHISA2	ENSFCAG00000001582	A1:5670375-5670960	0.899738	0.123612	0.17592
TTC7B	ENSFCAG00000001583	B3:135219790-135450602	17.1295	25.6057	19.3642
RPS6KA5	ENSFCAG00000001585	B3:135518726-135695526	0.228864	0.0835114	0.244052
C14orf159	ENSFCAG00000001586	B3:135777418-135817441	0	0.0269138	0.0948711
GPR68	ENSFCAG00000001587	B3:135824777-135825860	4.59385	8.61045	9.61698
CCDC88C	ENSFCAG00000001588	B3:135870688-135924936	0.126378	0.096749	0.0983325
IL13	ENSFCAG00000001591	A1:110130364-110322513	0	0	0
EPHX4	ENSFCAG00000001592	C1:76871790-77003919	0.0664464	0	0
EED	ENSFCAG00000001593	D1:48955003-48984883	21.7066	21.491	22.2307
XAB2	ENSFCAG00000001594	A2:6029716-6042336	15.5569	14.9051	14.497
PCP2	ENSFCAG00000001595	A2:6025411-6027822	0	0.773673	0
STXBP2	ENSFCAG00000001596	A2:6013875-6022225	15.3586	15.86	12.5291
RETN	ENSFCAG00000001597	A2:5999671-6000778	0	0	0
MCEMP1	ENSFCAG00000001600	A2:5992209-5994267	0	0	0.0886977
FCER2	ENSFCAG00000001601	A2:5977547-5983327	0	0	0
CLEC4G	ENSFCAG00000001602	A2:5957488-5960297	0	0	0
GCNT2	ENSFCAG00000001603	B2:17975938-17977638	0	0	0
PDGFC	ENSFCAG00000001605	B1:71697144-71901171	1.26915	4.56204	2.16247
PAK1IP1	ENSFCAG00000001606	B2:17830620-17842688	17.5672	20.7494	20.1615
GCM2	ENSFCAG00000001608	B2:17704536-17712079	0	0	0
CCT2	ENSFCAG00000001610	B4:96731278-96751013	81.6112	86.0272	81.0277
LRRC10	ENSFCAG00000001611	B4:96755995-96756835	0	0	0
BEST3	ENSFCAG00000001612	B4:96785700-96824190	0	0	0
POLK	ENSFCAG00000001614	A1:140369724-140417198	7.90051	8.20417	7.94997
-	ENSFCAG00000001617	B4:45248754-45252971	0	0	0
-	ENSFCAG00000001618	E1:56334151-56334460	0	0	0
POP4	ENSFCAG00000001619	E2:22301546-22310607	18.6282	12.311	16.8168
-	ENSFCAG00000001621	B4:45132293-45137356	0	0	0.0381252
C19orf12	ENSFCAG00000001623	E2:22236075-22239918	5.44131	6.45079	6.07311
CCNE1	ENSFCAG00000001624	E2:22144955-22155082	3.0511	3.19934	3.66329
-	ENSFCAG00000001625	B4:45019902-45109306	75.8384	78.7973	67.3083
-	ENSFCAG00000001626	E1:56482817-56488073	0	0	0
RAB37	ENSFCAG00000001627	E1:56512256-56516762	0.273113	0.102304	0.0705083
PAX5	ENSFCAG00000001628	D4:60588854-60774604	0	0	0.0293492
SAMD15	ENSFCAG00000001629	B3:123501281-123533850	0.1887	0.0376619	0.194734
VIPAS39	ENSFCAG00000001631	B3:123534075-123553779	12.6209	12.4171	11.6007
AHSA1	ENSFCAG00000001632	B3:123558941-123566699	55.05	56.6811	58.0491
ISM2	ENSFCAG00000001633	B3:123571423-123577029	0.519655	0.378784	0.351044
SPTLC2	ENSFCAG00000001634	B3:123592311-123697628	11.7329	13.4037	14.3569
SNW1	ENSFCAG00000001637	B3:123732968-123801364	21.1071	20.3083	20.186
ADCK1	ENSFCAG00000001639	B3:123849077-123958740	4.87209	2.30012	2.70662
GNG10	ENSFCAG00000001640	D4:74027522-74027648	7653.7	5993.55	6219.45
GPT2	ENSFCAG00000001642	E2:27441501-27474918	13.2022	15.9733	13.0496
G2E3	ENSFCAG00000001645	B3:81997819-82064916	9.14496	9.42502	10.9989
GHITM	ENSFCAG00000001647	D2:45126395-45142801	163.097	187.615	168.025
CDHR1	ENSFCAG00000001649	D2:45169428-45191508	0.115943	0	0.0554899
TRIM42	ENSFCAG00000001651	C2:121805089-121829192	0	0	0
DPYSL5	ENSFCAG00000001652	A3:120963119-121021322	0.206005	0.0173556	0.111151
LRIT2	ENSFCAG00000001653	D2:45195712-45199367	0	0	0
LRIT1	ENSFCAG00000001654	D2:45205244-45216143	0	0	0
RGR	ENSFCAG00000001655	D2:45218666-45228760	0	0	0
SLC35F3	ENSFCAG00000001656	D2:14137511-14255840	0	0	0
METTL24	ENSFCAG00000001657	B2:101585404-101654338	0.146222	0.240669	0
DDO	ENSFCAG00000001658	B2:101712711-101733358	0.102905	0	0.0395039
CDK19	ENSFCAG00000001659	B2:101865262-102045548	2.78576	3.02722	2.59925
CTC1	ENSFCAG00000001661	E1:2829235-2975322	12.9616	11.2715	12.2807
PFAS	ENSFCAG00000001662	E1:2829235-2975322	21.9103	15.505	23.9809
RANGRF	ENSFCAG00000001663	E1:2829235-2975322	10.5876	7.51314	11.6473
ARHGEF15	ENSFCAG00000001665	E1:2975970-2984540	0	0	0.0796732
VPS53	ENSFCAG00000001666	E1:15282909-15414438	12.1988	10.8493	11.8608
ODF4	ENSFCAG00000001667	E1:2994107-2997887	0	0	0.0668621
FAM57A	ENSFCAG00000001669	E1:15429173-15434932	13.9456	12.0366	19.3811
RPL26L1	ENSFCAG00000001670	A3:103541738-103542958	0	0	0
-	ENSFCAG00000001672	E1:15444634-15444898	0	1.22473	0
RNMTL1	ENSFCAG00000001673	E1:15469690-15476100	3.86841	5.31775	3.85827
NXN	ENSFCAG00000001674	E1:15483154-15511839	104.207	105.623	105.38
ANGPTL5	ENSFCAG00000001675	D1:656643-671869	0	0	0
CBX2	ENSFCAG00000001677	E1:60279501-60284743	1.75343	1.95207	2.26665
KRTAP11-1	ENSFCAG00000001682	C2:13979270-13979729	0	0	0
ANKRD45	ENSFCAG00000001684	F1:15366492-15405458	7.71493	9.95072	29.3786
BTNL2	ENSFCAG00000001685	B2:34239988-34254166	0	0	0
CCDC152	ENSFCAG00000001690	A1:204846664-204874618	0.144146	0	0.483004
TMEM132C	ENSFCAG00000001691	D3:3181174-3385771	0	0.0142865	0
SLC15A4	ENSFCAG00000001693	D3:3094056-3120704	26.561	24.1563	25.1499
WNT9A	ENSFCAG00000001698	A1:89559064-89562982	0.131818	0.144502	0.103764
CCDC182	ENSFCAG00000001699	E1:31155278-31155740	0	0	0
-	ENSFCAG00000001700	B4:72472928-72473867	0	0	0
PHAX	ENSFCAG00000001701	A1:105009081-105021816	26.6658	25.1774	33.2553
TARS2	ENSFCAG00000001702	C1:102807868-102822558	28.2723	25.5353	25.834
COX5B	ENSFCAG00000001704	A3:64690963-64692634	422.352	400.54	395.543
MPPED2	ENSFCAG00000001706	D1:86728774-86896341	0.157664	0	0.0403735
WNT8A	ENSFCAG00000001707	A1:115157845-115162876	0	0	0
BRD8	ENSFCAG00000001709	A1:115218726-115239548	16.6405	22.2184	17.8777
KIF20A	ENSFCAG00000001710	A1:115240580-115269006	17.3787	10.4748	19.8272
CDC23	ENSFCAG00000001711	A1:115240580-115269006	10.3911	10.0725	11.5243
GFRA3	ENSFCAG00000001712	A1:115298726-115316054	0.417712	0.183253	0.459154
FAM53C	ENSFCAG00000001714	A1:115360458-115364462	18.5384	24.0296	16.0609
KDM3B	ENSFCAG00000001715	A1:115386445-115440708	14.5272	14.1715	14.543
HSPA9	ENSFCAG00000001718	A1:115535155-115551307	250.597	252.401	261.407
CTNNA1	ENSFCAG00000001719	A1:115686910-115861661	95.256	103.444	83.4717
LRRTM2	ENSFCAG00000001720	A1:115686910-115861661	0.521456	0.659782	0.514757
SIL1	ENSFCAG00000001721	A1:115876609-116041342	21.3064	21.6716	25.0204
-	ENSFCAG00000001723	A1:116222613-116231172	0.028482	0.0314566	0.134007
SPATA24	ENSFCAG00000001726	A1:116243369-116248639	1.05044	1.58148	0.554882
DNAJC18	ENSFCAG00000001727	A1:116258074-116280536	8.32275	8.16396	7.99977
TMEM173	ENSFCAG00000001729	A1:116303765-116307729	0.293906	0.162252	0.307832
CHST4	ENSFCAG00000001730	E2:49903573-49904704	0	0	0
ENO3	ENSFCAG00000001731	E1:1635843-1642435	8.99359	7.43229	8.61106
KIRREL	ENSFCAG00000001732	F1:65573822-65588337	50.0102	60.1039	53.3046
GRPR	ENSFCAG00000001733	X:12220772-12249550	0	0.114105	0.0803975
HECTD1	ENSFCAG00000001734	B3:82487979-82581096	31.7941	31.5224	31.4722
EMC4	ENSFCAG00000001736	B3:71446456-71451074	35.9533	39.7745	35.5428
SLC12A6	ENSFCAG00000001737	B3:71454502-71536919	9.32325	11.6028	8.44277
DNAJB8	ENSFCAG00000001739	A2:56358681-56359374	0	0	0
NUTM1	ENSFCAG00000001740	B3:71543924-71553929	0.0540693	0.0355313	0.0334835
LPCAT4	ENSFCAG00000001741	B3:71555000-71561591	65.1289	68.6643	77.0725
-	ENSFCAG00000001743	B1:145849598-145850311	0	0	0
MTMR3	ENSFCAG00000001744	D3:21200945-21260841	14.4308	14.4303	14.251
MAPK13	ENSFCAG00000001747	B2:37413552-37421747	1.09908	0.583174	0.795385
BRPF3	ENSFCAG00000001748	B2:37480794-37511469	5.97544	7.16325	6.24772
AIP	ENSFCAG00000001749	D1:111747306-111754147	22.017	20.8557	20.163
PNPLA1	ENSFCAG00000001750	B2:37545847-37592230	0	0	0
PITPNM1	ENSFCAG00000001751	D1:111755023-111765323	7.50595	6.3532	8.44369
C6orf222	ENSFCAG00000001752	B2:37598165-37609707	0	0	0
CDK2AP2	ENSFCAG00000001753	D1:111769573-111770726	37.836	46.5681	40.8672
CABP2	ENSFCAG00000001754	D1:111777729-111781994	0	0	0
-	ENSFCAG00000001755	D1:111821441-111824478	120.608	101.05	95.9535
NDUFV1	ENSFCAG00000001757	D1:111835620-111840869	86.84	76.3504	79.9673
NUDT8	ENSFCAG00000001759	D1:111847181-111849035	3.53249	3.87656	2.84716
TBX10	ENSFCAG00000001760	D1:111850385-111853768	0	0	0
-	ENSFCAG00000001762	A2:20228554-20230399	964.021	939.048	954.739
CRH	ENSFCAG00000001763	F2:16339448-16340045	0.710436	0.938068	0.891653
-	ENSFCAG00000001764	D4:28103190-28107136	1.09816	0.0414471	0.908009
CINP	ENSFCAG00000001765	B3:145477980-145490677	20.4301	19.0793	21.1942
-	ENSFCAG00000001766	B1:124230895-124231498	0	0	0
GEMIN7	ENSFCAG00000001767	E2:10580100-10580496	26.2099	19.9575	25.0909
PPP1R37	ENSFCAG00000001768	E2:10539391-10542654	14.1825	14.8691	13.9035
TSPEAR	ENSFCAG00000001772	C2:2005368-2055957	0	0.232295	0.0548642
ALDH1L1	ENSFCAG00000001776	A2:58451402-58575137	0	0.0300241	0
WDR19	ENSFCAG00000001779	B1:172656240-172751168	5.37086	4.39594	5.04005
ZNF236	ENSFCAG00000001780	D3:93097827-93187501	3.63216	3.8515	3.30384
RFC1	ENSFCAG00000001781	B1:172563473-172641173	9.89627	8.88191	10.3824
C19orf25	ENSFCAG00000001782	A2:842393-844553	39.9822	57.3692	61.9423
ADAMTSL5	ENSFCAG00000001783	A2:864389-870118	16.2146	16.3756	18.2632
PLK5	ENSFCAG00000001784	A2:879122-885990	0.03369	0	0.0534588
MYRIP	ENSFCAG00000001785	C2:149684444-149991171	0.0152234	0.083108	0.011856
ENTPD3	ENSFCAG00000001786	C2:149545418-149582102	8.9195	7.06919	3.91173
FAM179A	ENSFCAG00000001789	A3:119129567-119169920	0.342057	0.109351	0.345772
CLIP4	ENSFCAG00000001791	A3:119021314-119077830	11.2856	3.13914	3.12024
ALK	ENSFCAG00000001792	A3:118339008-119011123	0	0	0.0133157
-	ENSFCAG00000001793	D1:77577257-77741904	5.80597	6.74837	8.53734
-	ENSFCAG00000001796	D1:21029959-21030926	0	0	0
-	ENSFCAG00000001798	X:106006435-106025493	14.1362	12.3576	14.9985
NELL1	ENSFCAG00000001799	D1:78283202-79161991	0.289879	0	0.0299063
NCK1	ENSFCAG00000001801	C2:125243240-125263015	34.3035	35.6305	33.318
CLDN18	ENSFCAG00000001802	C2:124288358-124305236	0	0	0.0560065
IL20RB	ENSFCAG00000001804	C2:125200303-125232377	1.89489	2.38386	3.33044
CLDN20	ENSFCAG00000001805	B2:141643640-141820669	0.349426	0.192756	0.0679701
TDRD5	ENSFCAG00000001806	F1:20796357-20901495	0.196771	0.136456	0.204881
NPHS2	ENSFCAG00000001807	F1:20773181-20792729	3.36475	3.39277	3.23168
OPCML	ENSFCAG00000001808	D1:28835960-28837264	0	0	0
ALDH8A1	ENSFCAG00000001809	B2:123851874-123874999	0	0	0
HBS1L	ENSFCAG00000001810	B2:123883923-123969360	27.3036	26.2939	27.1118
MYB	ENSFCAG00000001812	B2:124090965-124119497	0.30815	0.384552	0.521369
AHI1	ENSFCAG00000001813	B2:124175905-124365245	9.55554	11.4664	6.08889
-	ENSFCAG00000001814	D1:102240554-102241478	0	0	0
LHX9	ENSFCAG00000001815	F1:36524163-36535747	0	0.13581	0.0971607
FAM198B	ENSFCAG00000001817	B1:70580072-70625641	22.4741	33.4243	6.34131
LRRK2	ENSFCAG00000001819	B4:69914242-70051632	15.6515	13.4074	11.6561
ARHGAP10	ENSFCAG00000001820	B1:80090142-80413109	28.6234	20.4945	26.803
-	ENSFCAG00000001821	E3:4392571-4398807	0	0	0
CAMSAP1	ENSFCAG00000001822	D4:94325228-94362158	17.7513	18.0873	16.2152
-	ENSFCAG00000001823	F1:64494139-64495105	0	0	0
VPS16	ENSFCAG00000001825	A3:29407931-29420330	25.7454	18.4473	22.4732
LHPP	ENSFCAG00000001827	D2:82087629-82187073	19.2209	22.7333	24.0753
ISM1	ENSFCAG00000001828	A3:38279665-38545915	0.0325019	0.216051	0.0758802
TASP1	ENSFCAG00000001829	A3:38609367-38868451	4.94391	5.72301	3.94732
CNNM4	ENSFCAG00000001831	A3:64883944-64924771	4.51386	3.78448	4.70314
ANKRD23	ENSFCAG00000001833	A3:64851589-64855776	0.97282	1.48219	0.755383
SEMA4C	ENSFCAG00000001834	A3:64826681-64833830	6.57562	6.91102	8.67722
CFAP52	ENSFCAG00000001836	E1:3966625-4010099	0.49966	0.316159	0.789269
-	ENSFCAG00000001839	C1:218485720-218533973	21.3051	20.3204	17.8362
DHRS7C	ENSFCAG00000001840	E1:4108718-4125099	0	0	0
GLP2R	ENSFCAG00000001842	E1:4155420-4208227	0	0.0769763	0
KLHL30	ENSFCAG00000001843	C1:218616823-218625149	0.401562	0.50327	0.182335
GAS7	ENSFCAG00000001845	E1:4228573-4296028	3.30351	3.22202	5.73003
ILKAP	ENSFCAG00000001846	C1:218642383-218656648	14.905	16.877	15.6432
PER2	ENSFCAG00000001849	C1:218693504-218722388	3.53191	3.65983	2.39438
TRAF3IP1	ENSFCAG00000001850	C1:218752731-218814274	2.32918	2.89302	2.82521
ASB1	ENSFCAG00000001851	C1:218833992-218850268	6.96214	8.93989	5.60674
RBM34	ENSFCAG00000001852	D2:13368910-13388891	16.6026	13.4905	16.8715
-	ENSFCAG00000001853	B3:131602598-131603382	0	0	0
KIAA1456	ENSFCAG00000001856	B1:23862047-23875871	0.104587	0.0382496	0.0267266
C14orf37	ENSFCAG00000001858	B3:106535744-106565644	0.815298	0.962947	0.61018
SELENBP1	ENSFCAG00000001859	C1:103523530-103532221	0.0925752	0	0.0144032
PSMB4	ENSFCAG00000001861	C1:103572932-103576251	82.433	83.4697	79.9328
-	ENSFCAG00000001862	A2:54652658-54656530	13.4922	14.5247	13.4344
TMEM43	ENSFCAG00000001863	A2:54627229-54644935	84.4631	80.9846	90.1043
POGZ	ENSFCAG00000001864	C1:103579749-103629870	10.0192	10.1955	10.5244
XPC	ENSFCAG00000001865	A2:54597721-54626195	13.9671	9.90044	11.3005
FBXO43	ENSFCAG00000001868	F2:45621239-45631136	0.379953	0.417888	0.488511
POLR2K	ENSFCAG00000001869	F2:45641116-45642832	99.6089	64.5318	103.977
SPAG1	ENSFCAG00000001870	F2:45650268-45724255	3.3611	2.30378	3.27557
RNF19A	ENSFCAG00000001871	F2:45734685-45790348	17.4703	17.5101	17.4571
SNX31	ENSFCAG00000001873	F2:46038701-46109097	0	0	0
PABPC3	ENSFCAG00000001874	F2:46176951-46189075	714.285	715.624	799.666
SGK2	ENSFCAG00000001877	A3:16730381-16748547	0.048263	0	0.0124373
OR2T1	ENSFCAG00000001878	A1:82617874-82618963	0	0	0
-	ENSFCAG00000001879	A3:30353316-30361064	0.0727966	0	0.028424
TNFRSF11B	ENSFCAG00000001880	F2:62243174-62253922	0.713764	2.81644	1.39863
CNOT6	ENSFCAG00000001881	A1:90705318-90755086	18.1426	20.8749	23.6974
FLT4	ENSFCAG00000001882	A1:90641102-90670681	1.46966	1.66375	2.02137
WFDC3	ENSFCAG00000001883	A3:15070943-15083891	0	0	0
DNTTIP1	ENSFCAG00000001884	A3:15041828-15068790	18.7425	15.6585	18.1006
UBE2C	ENSFCAG00000001885	A3:15036481-15040731	36.7911	23.5134	48.9629
TNNC2	ENSFCAG00000001886	A3:15031233-15032273	0	0.375321	0.0883023
SNX21	ENSFCAG00000001887	A3:15020339-15025275	14.2791	11.9127	12.9088
ACOT8	ENSFCAG00000001888	A3:15008365-15019850	13.8559	14.6994	11.5588
ZSWIM3	ENSFCAG00000001889	A3:14998659-15007862	1.86794	2.70757	1.84939
ZSWIM1	ENSFCAG00000001890	A3:14994721-14996092	2.51806	2.87095	2.52893
SPATA25	ENSFCAG00000001891	A3:14992515-14993575	0.280663	0.411161	0.370262
CTSA	ENSFCAG00000001893	A3:14974263-14991427	158.327	111.661	177.891
PLTP	ENSFCAG00000001894	A3:14974263-14991427	0.765243	0.515119	0.290776
DCP2	ENSFCAG00000001895	A1:172487689-172531301	8.58504	9.67889	7.73007
MCC	ENSFCAG00000001896	A1:172544891-172656379	13.4711	11.2073	11.0896
ANKFN1	ENSFCAG00000001897	E1:32262216-32530094	0	0	0
TPX2	ENSFCAG00000001898	A3:26746294-26789339	17.5184	12.7844	24.1909
MYLK2	ENSFCAG00000001899	A3:26717712-26730006	0.0208432	0.022768	0.0161838
FOXS1	ENSFCAG00000001900	A3:26706841-26707834	2.74607	4.23858	2.48066
DUSP15	ENSFCAG00000001901	A3:26684408-26692406	0	0	0
TTLL9	ENSFCAG00000001902	A3:26634478-26676786	0	0	0
HCK	ENSFCAG00000001904	A3:26500845-26542096	0.0655238	0.0718797	0.0511403
TM9SF4	ENSFCAG00000001905	A3:26445294-26495025	46.0564	50.964	45.3464
ASXL1	ENSFCAG00000001908	A3:26228090-26299928	12.8037	11.4563	13.0346
PLA2G4A	ENSFCAG00000001911	F1:21189892-21282992	17.8561	14.4644	16.1683
ACKR2	ENSFCAG00000001913	C2:147436138-147437299	1.30581	0.11579	0.569841
C9orf72	ENSFCAG00000001914	D4:53052022-53072717	4.65193	6.13001	5.70219
IFNK	ENSFCAG00000001916	D4:53020017-53020644	0	0	0
PLPPR5	ENSFCAG00000001918	C1:83343262-83439728	0.841251	3.84483	2.00241
LRFN2	ENSFCAG00000001919	B2:41401196-41441082	0.452231	0	0
-	ENSFCAG00000001920	E1:42177482-42180960	0	0	0
IREB2	ENSFCAG00000001921	B3:265224-306624	25.3656	30.3207	26.0635
-	ENSFCAG00000001922	E1:42190366-42193781	0	0	0
-	ENSFCAG00000001924	E1:42228602-42232442	0	0	0
KRT32	ENSFCAG00000001926	E1:42244816-42251297	0	0	0
PSMA4	ENSFCAG00000001927	B3:231564-237548	114.602	94.0703	100.14
-	ENSFCAG00000001928	E1:42280348-42284670	0	0	0
BPTF	ENSFCAG00000001929	E1:48689226-48797018	10.3444	12.0906	10.1887
CHRNA5	ENSFCAG00000001930	B3:168334-181597	0.153358	0	0.0292545
-	ENSFCAG00000001931	E1:42293164-42297200	0	0	0
CHRNA3	ENSFCAG00000001932	B3:151240-164560	0.0294653	0	0.023009
CHRNB4	ENSFCAG00000001933	B3:134959-148020	0	0	0.0188933
KRT19	ENSFCAG00000001934	E1:42302417-42306084	0	0	0
KRT16	ENSFCAG00000001935	E1:42378038-42380792	0.213589	0.0292079	0.083652
KPNA2	ENSFCAG00000001936	E1:48646601-48655262	96.164	80.8449	118.992
-	ENSFCAG00000001938	E2:61799463-61804310	140.049	142.479	125.251
IL23R	ENSFCAG00000001939	C1:54656072-54712566	0	0	0
IL12RB2	ENSFCAG00000001940	C1:54764322-54829774	0.0339268	0.335968	0.195635
ARL9	ENSFCAG00000001942	B1:160028655-160047157	3.52179	0.901891	3.73696
RNF152	ENSFCAG00000001944	D3:80958581-80959190	11.2628	16.2523	11.7968
DENND4C	ENSFCAG00000001945	D4:46349813-46429428	29.439	25.9742	30.4314
SLC29A4	ENSFCAG00000001946	E3:3861674-3872605	0.32913	0.144742	0.104422
CH25H	ENSFCAG00000001947	D2:8512295-8515840	0.447249	0.365132	0.617637
LIPA	ENSFCAG00000001948	D2:8522275-8558203	5.8281	3.43733	7.16391
-	ENSFCAG00000001949	E3:3875891-3984757	33.2979	42.9141	35.7475
-	ENSFCAG00000001951	E3:3875891-3984757	35.6233	44.7212	36.0272
NMUR1	ENSFCAG00000001952	C1:213330801-213334318	0.0944557	0.155031	0.149411
JAK1	ENSFCAG00000001953	C1:52465245-52665573	88.1461	50.9369	60.4109
ARMC8	ENSFCAG00000001954	C2:124029995-124107488	8.15167	7.76276	7.25594
NME9	ENSFCAG00000001955	C2:124001211-124025136	0	0	0
CCNF	ENSFCAG00000001956	E3:40971252-40990090	4.54103	3.22627	5.99947
COL5A1	ENSFCAG00000001958	D4:92993010-93050860	178.105	479.559	260.785
NTN3	ENSFCAG00000001959	E3:40956472-40958334	0.0824655	0.0453469	0.262985
-	ENSFCAG00000001960	E3:40928499-40939424	2.59584	1.83559	2.41916
ATP6V0C	ENSFCAG00000001961	E3:40917939-40922232	209.078	242.183	217.434
-	ENSFCAG00000001962	E3:40907561-40917213	32.9201	16.8013	29.417
PDPK1	ENSFCAG00000001964	E3:40826747-40860798	15.6764	20.3985	17.7801
-	ENSFCAG00000001966	C1:104932326-104932593	0	0	0
2016-09-10	ENSFCAG00000001967	A3:53512581-53545538	71.658	72.8321	74.701
BACE2	ENSFCAG00000001969	C2:4603108-4654428	145.738	154.139	160.567
FAM3B	ENSFCAG00000001970	C2:4518391-4554531	0	0	0
H1FNT	ENSFCAG00000001971	B4:77711922-77712669	0	0.154333	0
ZNF641	ENSFCAG00000001972	B4:77723477-77783557	1.64236	2.3254	1.9844
-	ENSFCAG00000001973	B3:19164040-19215842	12.3859	9.93335	8.78042
CD2	ENSFCAG00000001976	C1:97487095-97499400	0	0	0
PTGFRN	ENSFCAG00000001977	C1:97663058-97706298	47.201	18.2647	17.8962
CD101	ENSFCAG00000001979	C1:97728959-97749382	0.0289147	0.0318777	0.0223113
TTF2	ENSFCAG00000001981	C1:97777285-97819415	8.61823	7.13672	9.5794
RBM41	ENSFCAG00000001982	X:86422559-86476618	4.62987	4.19437	4.73589
SREBF1	ENSFCAG00000001983	E1:11477185-11515324	34.3424	31.0644	38.2044
NUP62CL	ENSFCAG00000001984	X:86484246-86551790	0.659467	0.258208	0.628535
DRC3	ENSFCAG00000001986	E1:11312746-11348215	1.77202	1.62116	1.13479
-	ENSFCAG00000001991	B3:71897223-71898141	0	0	0
OR4K15	ENSFCAG00000001993	B3:72435761-72436736	0	0	0
SLC22A11	ENSFCAG00000001994	D1:109243666-109258631	0	0	0
SEMA3B	ENSFCAG00000001995	A2:18805454-18811795	7.07213	4.91781	4.44393
RCAN3	ENSFCAG00000001996	C1:17424087-17450671	18.0548	14.487	15.2718
SLC22A12	ENSFCAG00000001997	D1:109274609-109282056	0	0	0
NRXN2	ENSFCAG00000001998	D1:109299503-109387297	0	0.0373979	0.0270083
FBP2	ENSFCAG00000001999	D4:28111575-28140532	0	0	0
ZMYND10	ENSFCAG00000002000	A2:18856535-18860773	0.776828	0.469099	0.982222
NPRL2	ENSFCAG00000002001	A2:18862205-18865366	9.1972	7.05709	7.60657
HEATR9	ENSFCAG00000002003	E1:22693601-22706751	0	0	0
-	ENSFCAG00000002004	B1:127578870-127579940	0	0	0
ADGRD2	ENSFCAG00000002006	D4:85459588-85478207	0	0	0
PSD3	ENSFCAG00000002007	B1:39724468-39980314	5.87869	4.69983	6.46084
TPRG1	ENSFCAG00000002008	C2:81063489-81177338	0.59464	0.566129	0.611566
ZYG11A	ENSFCAG00000002009	C1:41716416-41762611	0.0847387	0.342706	0.0432394
ECHDC2	ENSFCAG00000002011	C1:41765435-41783614	11.0314	11.3579	11.2724
ARID3B	ENSFCAG00000002012	B3:33648266-33702607	0.740196	0.734642	0.981364
EDC3	ENSFCAG00000002014	B3:33564716-33628940	7.09235	7.1953	6.11763
KRT24	ENSFCAG00000002015	E1:41551862-41557225	0.0256739	0	0
CYP1A1	ENSFCAG00000002016	B3:33532066-33538470	4.19574	4.0617	1.36957
KRT28	ENSFCAG00000002018	E1:41611581-41641798	0	0.0299805	0
KRT10	ENSFCAG00000002019	E1:41651557-41655388	1.04022	0.598668	0.590699
KRT12	ENSFCAG00000002020	E1:41691356-41696781	0.0284368	0.0624561	0.0220675
KRT20	ENSFCAG00000002021	E1:41703277-41710107	0	0	0
KRT23	ENSFCAG00000002022	E1:41746747-41763009	0.0338493	0	0
KRT39	ENSFCAG00000002023	E1:41781402-41788438	0	0	0
NAT10	ENSFCAG00000002028	D1:90038557-90073737	11.4989	11.2542	12.2987
ABTB2	ENSFCAG00000002029	D1:90077452-90252076	3.32923	1.80501	2.35585
CAT	ENSFCAG00000002030	D1:90314710-90352295	83.9222	59.6176	55.2994
EHF	ENSFCAG00000002031	D1:90526774-90545020	0	0	0
TRIM39	ENSFCAG00000002034	B2:31948640-31958416	3.18631	2.96971	3.03709
CD74	ENSFCAG00000002036	A1:196399726-196408404	0.323285	0.396925	0.285299
FAM210B	ENSFCAG00000002037	A3:6457815-6458662	20.6678	20.5115	20.702
NDST1	ENSFCAG00000002041	A1:196286560-196313656	21.4925	30.525	27.108
NLRP9	ENSFCAG00000002042	E2:2695966-2716981	0	0.0180568	0.0125915
SYNPO	ENSFCAG00000002043	A1:196204527-196233090	5.48032	10.3239	8.09182
EXOC5	ENSFCAG00000002045	B3:105776945-105814702	44.4146	48.7632	45.123
AP5M1	ENSFCAG00000002046	B3:105833607-105852306	8.10997	9.9055	8.07249
GNAZ	ENSFCAG00000002047	D3:24058876-24139006	3.10293	1.99102	7.17615
RAB36	ENSFCAG00000002048	D3:24142568-24157067	1.2839	1.63179	1.44053
BCR	ENSFCAG00000002050	D3:24168984-24297583	15.6	13.3003	15.4503
SOX5	ENSFCAG00000002051	B4:59017831-59226802	0.358613	0.96876	0.256305
TMED7-TICAM2	ENSFCAG00000002053	A1:94994116-95036929	37.6392	39.5472	38.9635
TNNT1	ENSFCAG00000002054	E2:3148280-3159109	0.0948448	0.154386	0.330136
PDE7A	ENSFCAG00000002055	F2:15889983-16018425	3.81476	9.2375	3.93342
DLG5	ENSFCAG00000002056	D2:40300169-40376580	16.7002	20.1687	16.7142
ACAP2	ENSFCAG00000002057	C2:72875052-73010453	21.3674	24.111	25.7853
PSMD11	ENSFCAG00000002060	E1:19951161-19982026	48.2053	52.4925	55.2713
C10orf71	ENSFCAG00000002061	D2:49465781-49470044	0	0	0
DRGX	ENSFCAG00000002062	D2:49498607-49532573	0	0	0
CHAT	ENSFCAG00000002065	D2:49702951-49747410	0	0	0
STPG1	ENSFCAG00000002066	C1:17261960-17316703	0.269179	0.0912733	0.0805536
NIPAL3	ENSFCAG00000002067	C1:17322663-17367003	17.7489	8.3961	8.98368
ARG1	ENSFCAG00000002068	B2:120868695-120896263	0	0	0
TULP2	ENSFCAG00000002071	E2:8409398-8417728	0.494681	0.321249	0.28267
DGKD	ENSFCAG00000002072	C1:214804157-214887729	4.49122	4.74992	3.96529
UBE2E3	ENSFCAG00000002075	C1:168836185-168841890	82.7732	100.452	91.8795
TANC2	ENSFCAG00000002076	E1:47243362-47550346	3.17439	3.5179	3.62162
CYB561	ENSFCAG00000002077	E1:47558093-47572363	9.27525	4.51599	5.48511
-	ENSFCAG00000002078	E1:47593155-47612897	0.31512	0.0335911	0.167159
COPG1	ENSFCAG00000002080	A2:55963516-55983623	131.322	172.901	133.145
GLI1	ENSFCAG00000002081	B4:86213686-86221138	0.111258	0.0953066	0.427545
ARHGAP9	ENSFCAG00000002082	B4:86221294-86246630	0.134296	0.130923	0.255925
MARS	ENSFCAG00000002083	B4:86221294-86246630	42.7938	45.5022	42.5557
DDIT3	ENSFCAG00000002084	B4:86246864-86247485	19.3076	49.5992	23.2184
DCTN2	ENSFCAG00000002086	B4:86260228-86274175	99.4097	89.23	89.7424
KIF5A	ENSFCAG00000002087	B4:86277680-86305444	0.114423	0.024991	0.106082
DTX3	ENSFCAG00000002088	B4:86325569-86327856	4.86042	3.04242	3.97306
ARHGEF25	ENSFCAG00000002089	B4:86328872-86335881	7.61548	18.4008	6.02146
B4GALNT1	ENSFCAG00000002090	B4:86344972-86350538	0.0639869	0	0.100621
FBXW12	ENSFCAG00000002091	A2:17226879-17248381	0.178039	0.353402	0.0824013
PLXNB1	ENSFCAG00000002093	A2:17259587-17279603	1.27472	2.71108	1.64601
-	ENSFCAG00000002094	A2:17299658-17313794	4.13121	3.20071	3.77976
PFKFB4	ENSFCAG00000002096	A2:17351116-17382177	0.714526	0.615272	0.827533
NCK2	ENSFCAG00000002097	A3:57028258-57071112	24.5139	28.0251	20.9586
COL7A1	ENSFCAG00000002099	A2:17388734-17419621	1.81568	5.56637	3.65254
UQCRC1	ENSFCAG00000002100	A2:17423289-17432438	111.514	116.181	122.05
CELSR3	ENSFCAG00000002102	A2:17455083-17480800	0.432392	0.421302	0.218044
GTF2F2	ENSFCAG00000002105	A1:25377364-25532820	13.087	12.2936	15.3623
KCTD4	ENSFCAG00000002106	A1:25377364-25532820	0	0	0.056567
TPT1	ENSFCAG00000002107	A1:25331835-25335330	2012.4	2296.48	2120.39
DDX21	ENSFCAG00000002109	D2:32456008-32563799	24.6369	30.4837	31.7635
HOXB2	ENSFCAG00000002111	E1:38783537-38785087	5.14331	15.0253	6.12398
GRWD1	ENSFCAG00000002112	E2:11119929-11126430	19.0065	17.4914	24.0007
HOXB5	ENSFCAG00000002113	E1:38734706-38736239	0.56234	1.49673	1.01338
HOXB6	ENSFCAG00000002114	E1:38730318-38732053	5.89501	17.7573	9.04066
CYTH2	ENSFCAG00000002117	E2:11137992-11145353	23.0615	22.0344	25.997
HOXB7	ENSFCAG00000002118	E1:38717868-38720582	8.39429	13.0647	12.9989
HOXB13	ENSFCAG00000002120	E1:38625869-38627711	0	0	0
ARHGAP6	ENSFCAG00000002122	X:7720242-7791414	2.20123	1.70772	1.30793
TRAF5	ENSFCAG00000002126	F1:31420135-31440405	5.90494	7.78506	4.79074
LPGAT1	ENSFCAG00000002129	F1:31102762-31173048	20.7448	16.0755	22.2929
RBMS3	ENSFCAG00000002130	C2:144171843-144860285	11.4948	7.14664	7.79025
JUP	ENSFCAG00000002133	E1:42495707-42509290	46.5623	72.0474	44.3926
PDK3	ENSFCAG00000002134	X:20018239-20085226	2.58106	5.46431	2.53092
P3H4	ENSFCAG00000002135	E1:42530862-42536376	68.0399	100.37	89.8757
PCYT1B	ENSFCAG00000002136	X:20104463-20200081	7.95402	7.46361	7.10154
FKBP10	ENSFCAG00000002137	E1:42539013-42544793	100.372	114.396	134.325
POLA1	ENSFCAG00000002138	X:20249683-20553632	10.4257	6.8788	12.9032
KLHL10	ENSFCAG00000002139	E1:42554283-42560530	0.130115	0.0534754	0.0251282
ACLY	ENSFCAG00000002140	E1:42572146-42621577	107.583	122.178	135.731
TTC25	ENSFCAG00000002141	E1:42627536-42652172	0.0757955	0.0355621	0.0998989
DNAJC7	ENSFCAG00000002142	E1:42659521-42683003	24.2352	27.0436	23.7335
ZNF385C	ENSFCAG00000002143	E1:42694823-42722217	0	0	0
DHX58	ENSFCAG00000002145	E1:42746773-42754732	2.10966	0.44273	0.85136
KAT2A	ENSFCAG00000002146	E1:42755605-42762605	9.55743	7.70556	10.7077
-	ENSFCAG00000002148	E1:42765957-42769989	134.387	122.825	133.261
KCNH4	ENSFCAG00000002149	E1:42791641-42807325	0.0166225	0.0183103	0.0786946
GHDC	ENSFCAG00000002151	E1:42813583-42816938	5.37148	5.72031	6.73288
STAT5A	ENSFCAG00000002153	E1:42898090-42915618	13.4674	10.2811	13.0815
STAT3	ENSFCAG00000002154	E1:42919939-42987412	40.5177	34.5511	31.9881
TMEM18	ENSFCAG00000002155	A3:141948818-141954763	51.818	55.9451	34.955
HNRNPU	ENSFCAG00000002156	F1:4979874-4988975	146.485	140.929	155.709
FZR1	ENSFCAG00000002157	A2:2660789-2667419	22.9707	17.9928	24.6404
FCHO2	ENSFCAG00000002158	A1:138110777-138214861	6.39595	8.62202	9.16431
TUBGCP2	ENSFCAG00000002160	D2:89370915-89616726	19.6082	21.5276	19.874
TMEM171	ENSFCAG00000002161	A1:138246698-138253168	0	0	0
TMEM174	ENSFCAG00000002163	A1:138285602-138286524	0	0	0
MATN2	ENSFCAG00000002164	F2:43652219-43774280	0.435765	0.0318552	0.12409
-	ENSFCAG00000002165	F2:43779674-43783419	792.184	812.77	681.693
ERICH5	ENSFCAG00000002166	F2:43812228-43816590	0.1682	0	0.128297
HRSP12	ENSFCAG00000002167	F2:43826358-43839891	10.2042	10.1279	12.8588
POP1	ENSFCAG00000002168	F2:43840823-43873296	4.68435	5.80222	6.4531
B3GALT1	ENSFCAG00000002170	C1:156874890-156875871	0.109412	0.544716	0.209415
URB1	ENSFCAG00000002177	C2:12688695-12761476	4.49666	4.47543	5.1413
VIP	ENSFCAG00000002179	B2:139650545-139656996	0	0	0
CD320	ENSFCAG00000002180	A2:5564346-5565780	13.1171	16.6047	20.6189
NT5DC4	ENSFCAG00000002181	A3:104793410-104798940	0.123286	0.0913596	0.0641705
OGT	ENSFCAG00000002182	X:59250508-59286633	31.3821	36.1907	29.615
USP42	ENSFCAG00000002183	E3:4915584-4957023	3.09453	3.88913	3.28778
ACRC	ENSFCAG00000002184	X:59308290-59310143	0	0.123034	0.0849928
CXCR3	ENSFCAG00000002186	X:59313716-59314823	0	0	0
METAP1D	ENSFCAG00000002187	C1:160666121-160683827	8.0665	10.4565	9.70682
DLX1	ENSFCAG00000002188	C1:160688960-160691610	0.37886	0.829784	0.529733
-	ENSFCAG00000002189	B4:77590975-77591980	0	0	0
-	ENSFCAG00000002192	D1:63080815-63081763	0	0	0
RAB3C	ENSFCAG00000002193	A1:127117364-127454788	0	0	0
JAG1	ENSFCAG00000002195	A3:36218599-36254805	21.3385	49.563	16.6094
G6PC3	ENSFCAG00000002198	E1:44112777-44314146	16.4688	16.4077	14.9929
HDAC5	ENSFCAG00000002199	E1:44112777-44314146	23.1952	22.9015	22.657
MECR	ENSFCAG00000002202	C1:21135200-21166636	13.9375	11.3404	12.4976
PTPRU	ENSFCAG00000002203	C1:21187534-21248111	1.91657	0.748639	0.887742
NDUFA10	ENSFCAG00000002205	C1:220012065-220035584	59.3985	69.8936	67.5815
PDHB	ENSFCAG00000002206	A2:25922770-25929273	26.2761	24.118	28.3121
GPR50	ENSFCAG00000002207	X:122314233-122318979	0	0.065558	0
-	ENSFCAG00000002208	B3:113884573-113915430	0.102185	0.0749069	0.0259846
ACOX2	ENSFCAG00000002210	A2:25970469-25997742	0.131229	0.0720495	0.034177
NTHL1	ENSFCAG00000002211	E3:41318814-41324172	13.9399	12.0633	12.6215
PKD1	ENSFCAG00000002212	E3:41252249-41318149	25.7276	39.2369	29.712
SOX6	ENSFCAG00000002214	D1:74298494-74668738	0.205625	0.282665	0.251517
PITPNC1	ENSFCAG00000002216	E1:48927563-49060129	8.05509	9.79492	7.5282
SMYD3	ENSFCAG00000002219	F1:4048397-4103764	18.3221	14.6582	16.4764
MUTYH	ENSFCAG00000002222	C1:34899631-34903903	3.47673	3.26992	2.72877
A4GNT	ENSFCAG00000002224	C2:124193091-124200429	0	0.175824	0.0407729
SOD1	ENSFCAG00000002225	C2:13290963-13299343	77.2822	78.0741	64.6874
TSR2	ENSFCAG00000002226	X:46339096-46343350	12.1168	12.3735	14.3084
HIVEP1	ENSFCAG00000002227	B2:16510295-16549231	3.84008	5.52479	3.047
SCAF4	ENSFCAG00000002228	C2:13250601-13288109	13.5851	15.4658	14.9596
DBR1	ENSFCAG00000002229	C2:124147789-124159080	12.9815	14.4153	13.8869
FGD1	ENSFCAG00000002230	X:46344838-46386027	8.35538	7.55249	7.54522
PDE6D	ENSFCAG00000002232	C1:213494900-213546610	22.99	19.1143	24.2577
MAPK10	ENSFCAG00000002234	B1:134724919-134900785	0	0	0.026531
GALNT18	ENSFCAG00000002235	D1:69800466-69976821	4.4555	2.95088	5.35516
OR2C3	ENSFCAG00000002236	A1:88521632-88522592	0	0	0
TNFAIP2	ENSFCAG00000002239	B3:146162609-146170369	56.6211	3.36371	23.5419
NXT2	ENSFCAG00000002240	X:88587241-88590897	2.22155	1.15235	1.36659
OR5AP2	ENSFCAG00000002243	D1:103392035-103392989	0	0	0
-	ENSFCAG00000002245	X:41658439-41662057	328.417	285.787	354.549
CHRFAM7A	ENSFCAG00000002248	B3:22357010-22372738	0	0	0.152283
SRSF1	ENSFCAG00000002250	E1:30927842-30929973	95.1342	96.5968	94.882
OVCH2	ENSFCAG00000002251	D1:66753661-66759281	0	0	0
ITGA8	ENSFCAG00000002252	B4:14220044-14405383	0.499795	1.61308	1.81837
SEC63	ENSFCAG00000002253	B2:99462721-99534981	47.2901	55.68	56.1285
NR2E1	ENSFCAG00000002255	B2:99734262-99752109	0.0848859	1.43688	0.296769
HHIPL2	ENSFCAG00000002257	F1:58466387-58489649	0.302792	0.284423	0.201752
TAF1A	ENSFCAG00000002258	F1:58501900-58531367	2.04308	3.20976	2.66738
AIDA	ENSFCAG00000002260	F1:58617936-58654116	96.9723	84.7236	91.3518
POU1F1	ENSFCAG00000002261	C2:39761362-39778917	0	0	0
TMEM144	ENSFCAG00000002263	B1:70508234-70542618	0.358269	0.550775	0.907622
INCENP	ENSFCAG00000002264	D1:107564193-107590520	7.30299	4.88342	9.57137
CTBP1	ENSFCAG00000002265	B1:199232686-199247554	59.51	58.3397	60.5604
ZZEF1	ENSFCAG00000002267	E1:139462-239716	9.81027	10.2408	10.0198
CYB5D2	ENSFCAG00000002268	E1:240620-250949	16.0144	20.0605	10.164
ANKFY1	ENSFCAG00000002269	E1:258054-327877	20.7664	18.9937	19.5053
UBE2G1	ENSFCAG00000002270	E1:346464-371464	37.2012	45.3978	37.9969
SPNS3	ENSFCAG00000002271	E1:478731-512902	0	0	0.0285656
MYBBP1A	ENSFCAG00000002272	E1:551515-563892	48.1241	48.7605	52.5736
KSR2	ENSFCAG00000002273	D3:14131892-14559013	0.156955	0.69028	0.189483
RFC5	ENSFCAG00000002274	D3:14591556-14619276	20.6234	11.5499	26.9153
VSIG10	ENSFCAG00000002276	D3:14629660-14656580	26.3004	42.0957	28.1751
-	ENSFCAG00000002277	D3:14689160-14693244	235.81	246.399	167.165
CA10	ENSFCAG00000002278	E1:35786696-36273533	0	0	0
MC5R	ENSFCAG00000002279	D3:32611752-32612730	0	0	0
GOLGA4	ENSFCAG00000002280	C2:152232094-152348702	19.4599	18.5891	19.6772
ITGA9	ENSFCAG00000002281	C2:151842387-152163959	0.0292291	0.369385	0.306747
CTDSPL	ENSFCAG00000002282	C2:151690979-151723758	8.015	15.3728	8.47376
ALPK2	ENSFCAG00000002283	D3:78302227-78406559	0.352994	1.64541	0.338785
ITGB2	ENSFCAG00000002284	C2:1750097-1766480	0.0612136	0.0335313	0
VILL	ENSFCAG00000002285	C2:151665055-151678236	0.401036	1.14089	0.855652
PLCD1	ENSFCAG00000002286	C2:151641639-151664359	53.0041	45.9062	50.0552
ADM	ENSFCAG00000002289	D1:68948707-68949633	683.693	239.078	435.345
STX7	ENSFCAG00000002292	B2:121674133-121715287	37.1731	44.423	34.3839
ADAMTS5	ENSFCAG00000002300	C2:17711869-17755421	15.0651	8.61077	7.8523
TBX22	ENSFCAG00000002301	X:65852773-65860885	0	0	0
DNAH7	ENSFCAG00000002303	C1:181987900-182280567	0	0	0
DYNLRB1	ENSFCAG00000002304	A3:24418274-24429758	164.09	166.472	157.055
PIGU	ENSFCAG00000002305	A3:24313333-24397487	13.8124	14.1928	14.4476
NCOA6	ENSFCAG00000002306	A3:24242752-24278115	12.3899	13.207	12.0589
GGT7	ENSFCAG00000002307	A3:24137657-24160581	27.1148	33.1368	36.7681
FAM83D	ENSFCAG00000002308	A3:20757953-20766567	7.83527	4.54378	8.51015
ACSS2	ENSFCAG00000002309	A3:24084250-24134880	68.1509	51.0999	56.0304
GSS	ENSFCAG00000002310	A3:24055929-24082618	22.5651	17.8157	24.3711
MYH7B	ENSFCAG00000002311	A3:23955464-24035603	6.68204	7.26871	6.4897
TRPC4AP	ENSFCAG00000002312	A3:23955464-24035603	57.4553	67.2913	59.8024
EDEM2	ENSFCAG00000002313	A3:23878483-23910084	17.2223	16.7457	18.7978
PROCR	ENSFCAG00000002314	A3:23856318-23859866	17.1851	16.209	17.7811
FOXK2	ENSFCAG00000002315	E1:62417938-62443635	28.6268	31.6489	29.5074
-	ENSFCAG00000002316	E1:62495141-62500422	5.71982	3.1898	7.16953
WDR45B	ENSFCAG00000002317	E1:62465346-62480906	65.4359	63.537	53.2145
ZNF511	ENSFCAG00000002318	D2:89370915-89616726	12.9305	8.87402	12.8866
ETNPPL	ENSFCAG00000002319	B1:114589655-114610240	0	0	0
TOR1AIP2	ENSFCAG00000002320	F1:27771399-27802839	15.4882	14.9949	16.5846
NCR3	ENSFCAG00000002322	B2:33244255-33247909	0	0	0
FOXJ2	ENSFCAG00000002323	B4:44987406-44999078	30.8237	26.6742	30.5005
NECAP1	ENSFCAG00000002325	B4:44940708-44952445	10.4512	11.123	10.6913
PDCD5	ENSFCAG00000002326	E2:19701616-19707565	82.9379	94.0601	94.6621
SMC2	ENSFCAG00000002327	D4:67540759-67606465	12.2516	8.44075	16.0593
ANKRD27	ENSFCAG00000002328	E2:19647296-19698219	15.8487	18.6796	14.9158
CDH24	ENSFCAG00000002331	B3:75340784-75349323	4.21577	2.03297	4.22732
ACIN1	ENSFCAG00000002332	B3:75352748-75386606	18.9851	21.2241	20.7445
C14orf119	ENSFCAG00000002333	B3:75388322-75388748	27.4579	24.766	29.8325
CEBPE	ENSFCAG00000002334	B3:75403057-75404529	0	0	0
-	ENSFCAG00000002335	B3:75409622-75444489	0.647309	0.27988	0.50429
MYO3A	ENSFCAG00000002336	B4:23748738-23975645	0	0	0
GAD2	ENSFCAG00000002337	B4:23980428-24064625	0.138175	0.243227	0.320227
PRSS38	ENSFCAG00000002338	A1:89644990-89657175	0	0	0
TLE4	ENSFCAG00000002339	D4:20916047-21054624	11.201	17.1811	12.9329
-	ENSFCAG00000002340	B4:39221312-39222899	0.132328	0.474662	0.0518265
ZNF143	ENSFCAG00000002342	D1:68227056-68265647	7.41218	7.44031	8.13863
CXCL17	ENSFCAG00000002343	E2:12804688-12818126	0	0	0
ATP5G1	ENSFCAG00000002344	E1:38472894-38476090	93.6776	91.955	99.9177
PGS1	ENSFCAG00000002345	E1:59288068-59333427	8.4736	7.20509	6.41118
TARS	ENSFCAG00000002351	A1:212355039-212380259	103.669	101.66	103.122
ADAMTS12	ENSFCAG00000002352	A1:211990340-212320229	5.1166	9.97856	6.35856
RXFP3	ENSFCAG00000002353	A1:211972743-211974153	0	0	0.243565
SLC45A2	ENSFCAG00000002354	A1:211935854-211968041	0.172696	0.076056	0.187219
-	ENSFCAG00000002355	D1:63349711-63351475	0	0	0
TRIM32	ENSFCAG00000002357	D4:78122279-78997330	11.3514	10.0199	11.6131
RPS17	ENSFCAG00000002358	B3:4311939-4315069	1245.84	1106.59	1242.29
ATP5SL	ENSFCAG00000002361	E2:12961461-12967538	14.5517	10.9891	12.3997
MPHOSPH8	ENSFCAG00000002362	A1:682010-733533	17.0389	14.742	17.0446
TIAM1	ENSFCAG00000002364	C2:13655947-13794351	6.00065	2.86313	8.20862
GLIS3	ENSFCAG00000002365	D4:7531499-7629080	7.43816	5.06621	6.3601
RUFY4	ENSFCAG00000002367	C1:202065702-202082464	0.0439779	0.0962017	0.13588
-	ENSFCAG00000002368	D4:6931467-6943310	1.17985	0.840441	1.76068
SPATA6L	ENSFCAG00000002369	D4:6859821-6896388	0.180625	0.264865	0
-	ENSFCAG00000002370	C1:202161593-202190001	355.425	426.311	391.552
AAMP	ENSFCAG00000002372	C1:202197939-202262494	48.02	53.6839	49.7404
PNKD	ENSFCAG00000002373	C1:202197939-202262494	28.0983	23.1325	20.9415
TMBIM1	ENSFCAG00000002374	C1:202197939-202262494	59.8884	42.9135	52.023
CATIP	ENSFCAG00000002376	C1:202273154-202278924	0	0	0
SLC11A1	ENSFCAG00000002377	C1:202289971-202298134	0.0329448	0.109527	0
-	ENSFCAG00000002378	C1:202302154-202306899	53.809	48.2187	52.4729
VIL1	ENSFCAG00000002379	C1:202321917-202341345	0	0	0
USP37	ENSFCAG00000002380	C1:202346794-202433055	3.83176	3.91479	4.16613
TAF5	ENSFCAG00000002382	D2:63665985-63684296	1.38722	1.76906	1.90182
-	ENSFCAG00000002383	D2:63665985-63684296	302.111	323.333	226.775
PDCD11	ENSFCAG00000002384	D2:63692508-63734108	17.8756	16.2075	24.2528
CALHM2	ENSFCAG00000002386	D2:63692508-63734108	28.6273	27.5828	25.4636
CALHM1	ENSFCAG00000002387	D2:63739237-63742633	0	0	0
CALHM3	ENSFCAG00000002388	D2:63754114-63759528	0	0	0
-	ENSFCAG00000002390	D2:63856171-63873290	16.1572	18.9688	19.5958
TACR3	ENSFCAG00000002393	B1:118931392-119022160	0	0	0
SERPINA7	ENSFCAG00000002394	X:85363666-85367478	0	0	0
HS1BP3	ENSFCAG00000002398	A3:126410671-126439845	18.0522	14.2036	14.6978
MLEC	ENSFCAG00000002400	D3:16731819-16741943	35.7653	37.2682	44.5788
ACADS	ENSFCAG00000002402	D3:16767556-16779781	11.6194	9.06659	10.8256
GALNT13	ENSFCAG00000002404	C1:144218897-144732121	0	0.0304385	0
ZSCAN20	ENSFCAG00000002405	C1:24544119-24555037	3.36053	3.95493	3.31677
CSMD2	ENSFCAG00000002406	C1:24576151-24891353	0	0	0.00334238
HMGB4	ENSFCAG00000002407	C1:24909393-24913277	0	0	0
RASEF	ENSFCAG00000002416	D4:23970988-24047553	0	0	0
PLEKHA8	ENSFCAG00000002417	A2:121669419-121726171	11.2775	13.1095	12.18
SMOC2	ENSFCAG00000002419	B2:152694139-152814677	3.91088	8.00328	2.50044
THBS2	ENSFCAG00000002420	B2:153178753-153200398	172.806	84.1634	136.167
CTPS1	ENSFCAG00000002423	C1:30932119-30960587	18.4636	20.2747	22.8019
UBR1	ENSFCAG00000002426	B3:62124211-62241836	16.5842	18.9267	16.7365
FST	ENSFCAG00000002427	A1:199561298-199565727	13.6039	71.3068	20.6363
CLSTN2	ENSFCAG00000002429	C2:121922581-122064088	0.201867	0.359685	0.286437
-	ENSFCAG00000002430	A2:124175872-124649250	4.88204	7.49158	6.8137
RXRA	ENSFCAG00000002431	D4:93262327-93287546	25.6762	24.5749	24.2219
-	ENSFCAG00000002434	X:17733629-17763788	31.9008	25.7438	23.7997
ATP8B3	ENSFCAG00000002436	A2:1069773-1085891	0.718701	0.0983075	0.16108
-	ENSFCAG00000002437	D1:21041275-21043041	0	0	0
ZRANB1	ENSFCAG00000002438	D2:82465947-82503895	11.2475	14.3353	8.48127
SLC5A4	ENSFCAG00000002439	D3:23083863-23122884	0	0	0
SGTB	ENSFCAG00000002440	A1:133277934-133323263	15.574	13.2047	18.1624
CTBP2	ENSFCAG00000002441	D2:82508407-82653786	29.0872	28.4889	27.9733
ABHD17A	ENSFCAG00000002443	A2:1130341-1135597	100.423	100.744	106.062
LRRC39	ENSFCAG00000002445	C1:84330721-84451837	0.153429	0.0570886	0.0388291
DOCK3	ENSFCAG00000002447	A2:19269665-19767895	0.0840676	0.0702985	0.0879609
VPRBP	ENSFCAG00000002450	A2:19781664-19868435	9.22307	10.4562	9.373
BCAS1	ENSFCAG00000002451	A3:8355156-8420815	0.0449486	0.0492664	0.0172794
CYP24A1	ENSFCAG00000002452	A3:8241385-8257342	0.137034	0.0374606	0.158633
IGF2BP1	ENSFCAG00000002454	E1:38369616-38409192	1.40604	1.27949	1.32331
SLITRK1	ENSFCAG00000002455	A1:56410648-56412934	0	0	0
ERICH1	ENSFCAG00000002456	B1:447096-481217	3.00646	4.12914	3.84233
TBL1XR1	ENSFCAG00000002457	C2:88777109-88860708	31.5799	25.9244	30.6656
ADGRF2	ENSFCAG00000002459	B2:48104196-48110892	0.0296796	0.394154	0.985346
ADGRF4	ENSFCAG00000002460	B2:48136590-48147653	0.300752	2.50816	3.2344
OR8K1	ENSFCAG00000002461	D1:103240217-103241177	0	0	0
CNIH4	ENSFCAG00000002463	F1:857094-868791	58.8757	52.6396	58.0879
WDR26	ENSFCAG00000002464	F1:879185-911454	37.5378	45.3689	38.2467
CNTNAP2	ENSFCAG00000002465	A2:161254411-161501481	0	0	0
-	ENSFCAG00000002466	E3:10855360-10872614	13.9592	15.0406	11.6974
WBSCR16	ENSFCAG00000002467	E3:10812634-10846172	29.9564	33.6938	32.109
NCF1	ENSFCAG00000002468	E3:10733581-10742946	0.66068	0.941606	0.334288
UBALD2	ENSFCAG00000002469	E1:57758113-57758431	87.8898	79.2237	110.935
PKIG	ENSFCAG00000002473	A3:15953388-15956940	5.30569	9.0953	4.86929
ADA	ENSFCAG00000002474	A3:15936292-15951510	39.1474	2.40438	10.8245
HAT1	ENSFCAG00000002475	C1:160518220-160574865	33.9568	27.9096	38.5974
WISP2	ENSFCAG00000002476	A3:15861703-15874386	87.0781	0.628848	6.6116
ITPR1	ENSFCAG00000002477	A2:45469069-45771258	11.4694	20.5191	8.97184
MPV17L2	ENSFCAG00000002478	A2:13110759-13111916	16.8355	9.17992	15.2685
RAB3A	ENSFCAG00000002479	A2:13113108-13116379	2.77538	3.07507	1.8354
-	ENSFCAG00000002481	E2:1526494-1529861	0.215024	0.376174	0.497399
PRR9	ENSFCAG00000002483	C1:105108010-105108337	0	0	0
PGLYRP3	ENSFCAG00000002484	C1:105190716-105202411	0	0	0
CCDC125	ENSFCAG00000002485	A1:136405984-136428128	0.490373	0.336771	1.02374
RAD17	ENSFCAG00000002487	A1:136464855-136500293	8.47951	10.8328	7.95098
IL4	ENSFCAG00000002490	A1:110130364-110322513	0	0	0
SERTAD2	ENSFCAG00000002492	A3:84565089-84565990	19.4441	24.0164	19.2094
WDR17	ENSFCAG00000002493	B1:6184603-6253244	0.159973	0.200387	0.147855
ASB5	ENSFCAG00000002494	B1:6277775-6330368	0	0	0
P2RX2	ENSFCAG00000002495	D3:564370-785410	0	0	0
EDIL3	ENSFCAG00000002497	A1:147584896-147994221	51.4307	6.13395	10.2342
POLE	ENSFCAG00000002498	D3:564370-785410	9.92786	5.70089	12.5836
DISC1	ENSFCAG00000002499	D2:16442814-16550309	0.211762	0.128934	0.20221
PXMP2	ENSFCAG00000002500	D3:564370-785410	1.60659	1.9327	1.25612
-	ENSFCAG00000002503	D3:564370-785410	38.6293	25.2783	32.2033
ANKLE2	ENSFCAG00000002504	D3:543025-559871	14.9593	18.4703	16.5209
CDC14A	ENSFCAG00000002505	C1:84606190-84771558	2.27088	1.60769	1.61554
GOLGA3	ENSFCAG00000002506	D3:486250-528549	16.9389	21.0125	18.2631
CHFR	ENSFCAG00000002507	D3:451502-479004	49.4827	71.3831	50.5666
-	ENSFCAG00000002508	D3:397637-403298	3.67396	3.19439	2.87497
ZNF26	ENSFCAG00000002509	D3:362682-379800	2.77351	2.26798	2.00166
FRMD1	ENSFCAG00000002511	B2:152426517-152435478	0.21218	0	0
CPO	ENSFCAG00000002513	C1:192344952-192370232	0	0	0
KLF7	ENSFCAG00000002514	C1:192453296-192539007	19.7989	25.635	15.8504
CC2D1B	ENSFCAG00000002516	C1:41214419-41224934	9.05839	7.65448	7.87525
ORC1	ENSFCAG00000002517	C1:41228709-41255191	4.4492	3.14936	6.8343
PRPF38A	ENSFCAG00000002518	C1:41261911-41276284	21.1191	21.7883	21.2629
-	ENSFCAG00000002519	C1:212353466-212383364	2.81746	2.31293	3.10467
-	ENSFCAG00000002520	C1:212411712-212450045	11.7356	7.15558	9.27842
CTNND2	ENSFCAG00000002522	A1:230281840-230679581	0	0	0.0113129
LRP4	ENSFCAG00000002523	D1:100753009-100924384	0.613002	0.748422	0.584414
C11orf49	ENSFCAG00000002524	D1:100931038-101128581	6.1651	6.72946	6.2217
ARFGAP2	ENSFCAG00000002525	D1:101129829-101139430	21.4081	23.2015	22.1188
ACP2	ENSFCAG00000002527	D1:101160932-101189316	20.5557	19.9523	19.1
NR1H3	ENSFCAG00000002528	D1:101197085-101203011	0.915767	1.37033	0.773753
MADD	ENSFCAG00000002529	D1:101207788-101242621	0.308413	0.517205	0.378121
MYBPC3	ENSFCAG00000002530	D1:101245324-101262309	0	0.0872468	0
SPI1	ENSFCAG00000002531	D1:101264915-101280263	0	0.139053	0
SLC39A13	ENSFCAG00000002532	D1:101301763-101309913	13.7166	23.2433	19.8414
-	ENSFCAG00000002533	D1:101313275-101317665	72.3345	70.5143	71.9061
RAPSN	ENSFCAG00000002534	D1:101320543-101330863	0.0329393	0.0360204	0
CELF1	ENSFCAG00000002535	D1:101349837-101375347	20.2894	26.7205	20.7849
RAB1A	ENSFCAG00000002536	A3:84933782-84962322	227.676	222.246	213.807
-	ENSFCAG00000002537	D1:109060525-109063425	19.8849	25.2556	19.7871
ACER2	ENSFCAG00000002540	D4:46456284-46485673	1.49774	2.29806	1.4879
RPS6	ENSFCAG00000002541	D4:46349813-46429428	1250.62	1326.17	1301.73
GHRHR	ENSFCAG00000002543	A2:122545054-122556587	0	0	0
ADCYAP1R1	ENSFCAG00000002544	A2:122629472-122672863	0.0319422	0	0
-	ENSFCAG00000002545	A1:66651181-66804589	20.034	24.582	19.6291
C1QTNF1	ENSFCAG00000002553	E1:59703155-59707449	8.62357	2.92362	5.14449
ENGASE	ENSFCAG00000002554	E1:59724155-59733243	2.87359	3.16217	2.72776
RBFOX3	ENSFCAG00000002555	E1:59739242-59918941	0.488436	0.533016	0.739932
APIP	ENSFCAG00000002557	D1:90696401-90719978	48.6245	27.7304	21.3531
TRPC3	ENSFCAG00000002559	B1:102660635-102714600	0.352634	0.517077	0.0754916
RASA2	ENSFCAG00000002561	C2:121013270-121106341	3.14876	3.97532	4.18201
SUV39H1	ENSFCAG00000002566	X:41779971-41789690	5.11553	3.90521	6.40638
GLOD5	ENSFCAG00000002567	X:41853024-41859305	0	0	0
HDAC6	ENSFCAG00000002568	X:41887245-41908184	9.86108	6.82755	7.44003
TIMM17B	ENSFCAG00000002569	X:41934478-41942483	22.3953	16.2059	19.2416
PQBP1	ENSFCAG00000002570	X:41934478-41942483	28.3959	27.4089	31.2897
SLC35A2	ENSFCAG00000002571	X:41942561-41951493	21.9466	26.4375	29.2797
OTUD5	ENSFCAG00000002572	X:41961787-41988147	51.5632	54.1169	49.4742
GRIPAP1	ENSFCAG00000002573	X:42002177-42025194	8.34965	9.18072	7.97552
TFE3	ENSFCAG00000002574	X:42059036-42068974	40.9127	37.4449	41.5657
PRAF2	ENSFCAG00000002576	X:42093263-42096118	88.0958	80.1147	92.5612
WDR45	ENSFCAG00000002577	X:42096850-42101817	15.9645	14.6593	13.5735
KCND1	ENSFCAG00000002579	X:41991980-41998591	0.0766896	0.0560233	0
CRISP1	ENSFCAG00000002580	B2:50217260-50223025	0	0	0
SLC6A3	ENSFCAG00000002581	A1:238430866-238460557	0.257617	0.323803	0.173919
MID1	ENSFCAG00000002582	X:7112952-7216047	7.79087	9.01062	6.44045
FBXL19	ENSFCAG00000002585	E3:19747141-19766168	11.2734	10.2628	12.4703
SETD1A	ENSFCAG00000002588	E3:19715270-19736956	7.21866	7.33765	7.80072
EPRS	ENSFCAG00000002590	F1:56377525-56449675	143.893	168.733	151.875
HTRA4	ENSFCAG00000002591	B1:44928098-44938386	0	0.0444263	0.126322
TM2D2	ENSFCAG00000002593	B1:44920371-44925151	34.4535	40.9085	32.0478
HSD3B7	ENSFCAG00000002594	E3:19710472-19714090	29.4398	23.4175	18.7237
ADAM9	ENSFCAG00000002595	B1:44792972-44919764	277.715	290.29	280.117
IARS2	ENSFCAG00000002597	F1:56486567-56553591	27.2561	28.6325	28.7599
STX1B	ENSFCAG00000002598	E3:19700267-19707021	0.0447984	0.049122	0.138941
RAB3GAP2	ENSFCAG00000002599	F1:56553873-56672648	38.9029	40.4878	39.3554
PRSS53	ENSFCAG00000002602	E3:19635290-19647917	0.11759	0.227053	0.162736
BCKDK	ENSFCAG00000002604	E3:19619821-19623515	39.0162	42.2853	39.0933
KAT8	ENSFCAG00000002605	E3:19606045-19617514	15.6488	14.9147	13.2502
PRSS8	ENSFCAG00000002606	E3:19602107-19605310	0.0564408	0.186992	0.044357
PRSS36	ENSFCAG00000002607	E3:19590722-19599388	0.0613102	0.0900274	0.0645883
-	ENSFCAG00000002608	E3:19542073-19543165	8.88588	3.38895	3.39371
-	ENSFCAG00000002613	D1:21462843-21463842	0	0	0
-	ENSFCAG00000002614	D1:21354028-21355006	0	0	0
PANX3	ENSFCAG00000002616	D1:21499437-21505973	0	0.109042	0
GTF2I	ENSFCAG00000002617	E3:10636809-10717685	46.5013	50.6918	48.94
-	ENSFCAG00000002620	A2:932156-933722	243.965	213.798	296.772
SIAE	ENSFCAG00000002621	D1:21509713-21564477	3.01289	4.71573	1.29541
PPIL2	ENSFCAG00000002622	D3:28692127-28720327	25.4885	27.6147	23.6864
SPA17	ENSFCAG00000002623	D1:21565145-21575198	0	0	0.344484
NRGN	ENSFCAG00000002625	D1:21619083-21619302	1.77033	0	0
-	ENSFCAG00000002626	E3:10747573-10749247	6.38842	5.96903	4.84689
PPM1F	ENSFCAG00000002630	D3:28905825-28929444	18.3366	34.207	21.4386
TOP3B	ENSFCAG00000002631	D3:28941161-28961110	10.0653	9.95552	10.0922
FBXW8	ENSFCAG00000002632	D3:13659436-13765610	42.8751	43.7437	44.5082
TESC	ENSFCAG00000002633	D3:13773092-13800893	0.081573	0	0
FBXO21	ENSFCAG00000002634	D3:13857170-13901860	20.7941	24.2915	18.8621
NXPH3	ENSFCAG00000002636	E1:37973057-37974244	11.7675	17.9201	22.5278
SPOP	ENSFCAG00000002637	E1:37934700-37954379	29.0343	32.8794	31.9526
SLC35B1	ENSFCAG00000002638	E1:37865668-37871670	33.9439	42.7105	40.5207
FAM117A	ENSFCAG00000002639	E1:37844426-37863859	6.10072	5.45971	7.25631
KAT7	ENSFCAG00000002640	E1:37765916-37798136	7.04666	7.42982	6.89313
TAC4	ENSFCAG00000002641	E1:37751742-37757662	0	0	0
-	ENSFCAG00000002643	E1:37621068-37624501	0.249287	0.0684337	0.289793
-	ENSFCAG00000002645	D1:21250882-21251812	0	0	0
IGSF1	ENSFCAG00000002648	X:107185866-107199117	0	0	0
TANGO6	ENSFCAG00000002652	E2:46388973-46581366	5.81378	5.64678	6.0656
TNNT3	ENSFCAG00000002653	D1:115386082-115552939	0	0	0
ADGRB3	ENSFCAG00000002654	B2:64764497-65195364	0	0	0
USP51	ENSFCAG00000002655	X:47224381-47226286	0.338866	0.466374	0.346325
TNK2	ENSFCAG00000002658	C2:71293125-71339365	6.39221	14.7132	8.03368
PLIN2	ENSFCAG00000002659	D4:46205891-46222367	138.562	129.163	124.622
-	ENSFCAG00000002661	D1:116861424-116862747	0	0	0
ODF3	ENSFCAG00000002662	D1:116856088-116859742	0	0	0
C14orf166	ENSFCAG00000002663	B3:101023228-101040407	211.521	267.336	220.43
BET1L	ENSFCAG00000002664	D1:116851065-116852946	49.4005	38.1481	43.2478
NID2	ENSFCAG00000002665	B3:101041633-101108412	5.31621	8.66352	12.5768
SIRT3	ENSFCAG00000002668	D1:116811250-116843309	6.67592	6.13985	5.46002
PSMD13	ENSFCAG00000002669	D1:116811250-116843309	69.3642	66.1807	74.2672
MARK4	ENSFCAG00000002671	E2:10430872-10457818	9.0767	10.4088	9.4831
CKM	ENSFCAG00000002672	E2:10421275-10428721	0.0277139	0.0912983	0
KCND3	ENSFCAG00000002673	C1:94161809-94364057	0	0.0437092	0.0313611
AP1S3	ENSFCAG00000002674	C1:206981301-206991735	0.58101	0.811883	0
KLC3	ENSFCAG00000002676	E2:10384398-10406055	1.34617	1.88475	1.47909
WDFY1	ENSFCAG00000002677	C1:207064270-207090583	98.9152	79.0706	84.628
MRPL44	ENSFCAG00000002678	C1:207111156-207124037	26.4557	22.9461	26.2725
ERCC2	ENSFCAG00000002679	E2:10384398-10406055	7.12952	8.54202	7.46356
SERPINE2	ENSFCAG00000002680	C1:207131384-207157751	354.844	602.873	644.577
TXNRD2	ENSFCAG00000002682	D3:27129506-27176616	8.28129	6.70391	8.13615
COMT	ENSFCAG00000002684	D3:27106857-27112843	80.9821	105.818	83.4462
ADGRG5	ENSFCAG00000002685	E2:36754881-36765989	0	0	0
ARVCF	ENSFCAG00000002686	D3:27084361-27104773	1.24037	3.07773	2.04319
KATNB1	ENSFCAG00000002687	E2:36902509-36921576	13.1233	10.1224	10.7851
TANGO2	ENSFCAG00000002688	D3:27016873-27040132	18.3875	23.2026	17.1066
KIFC3	ENSFCAG00000002689	E2:36923518-36965515	2.91183	7.29722	5.62239
CNGB1	ENSFCAG00000002691	E2:37033314-37096614	0	0	0
USB1	ENSFCAG00000002693	E2:37125234-37134707	2.1949	3.57336	2.94827
MMP15	ENSFCAG00000002694	E2:37148304-37167467	1.45844	1.87229	1.36404
HAO2	ENSFCAG00000002698	C1:99842549-99859790	0	0	0
-	ENSFCAG00000002699	D2:89370915-89616726	2.90141	0.790469	7.11228
-	ENSFCAG00000002701	B1:44792972-44919764	0.135082	0.446195	0.41217
XPO1	ENSFCAG00000002702	A3:81849489-81888214	48.0306	44.8805	50.5349
KANSL3	ENSFCAG00000002703	A3:65030461-65063591	12.4666	13.7721	11.624
SLC16A6	ENSFCAG00000002704	E1:51097964-51107577	0.810268	0.605472	0.428789
ARSG	ENSFCAG00000002706	E1:51130464-51224985	0.495798	1.18803	0.760239
WIPI1	ENSFCAG00000002708	E1:51130464-51224985	29.6528	26.8166	20.4268
ZSCAN29	ENSFCAG00000002712	B3:61765544-61880021	2.96388	2.96433	2.52036
IDI1	ENSFCAG00000002714	B4:993302-994512	415.632	406.298	341.09
PLEKHM3	ENSFCAG00000002716	C1:193106127-193298803	5.53742	5.21472	6.03178
C10orf12	ENSFCAG00000002718	D2:58279091-58283354	3.31173	4.55582	3.7533
SLIT1	ENSFCAG00000002719	D2:58299241-58471313	0	0	0
FRAT1	ENSFCAG00000002720	D2:58584421-58585438	1.35256	1.47032	1.33245
ANKRD34A	ENSFCAG00000002723	C1:101875076-101876597	0.0333912	0.108917	0.0785135
AQP3	ENSFCAG00000002725	D4:57868021-57869958	0.663035	0.45786	1.038
GLG1	ENSFCAG00000002726	E2:51196589-51253856	75.4613	85.8422	81.6689
ERCC6L2	ENSFCAG00000002729	D4:29390879-29479075	9.20902	9.47475	8.63157
HSD17B3	ENSFCAG00000002732	D4:29751413-29799106	0	0	0
INSC	ENSFCAG00000002733	D1:73468680-73597611	0.0279767	0.122589	0.154271
CX3CR1	ENSFCAG00000002736	C2:150487333-150488404	0	0	0
CCR8	ENSFCAG00000002737	C2:150398433-150399501	0	0	0
SLC25A38	ENSFCAG00000002738	C2:150364179-150381931	12.1975	11.989	11.7779
-	ENSFCAG00000002739	C2:150338570-150343135	2080.36	2220.31	2207.4
CHTOP	ENSFCAG00000002740	F1:68470523-68478151	63.2666	75.5857	70.3157
-	ENSFCAG00000002741	D4:61939726-61941286	0.738295	0.681284	0.277066
CCDC180	ENSFCAG00000002742	D4:62024285-62105456	0	0	0
NPR1	ENSFCAG00000002743	F1:68436398-68441296	2.3469	0.554204	0.921501
INTS3	ENSFCAG00000002744	F1:68380263-68418045	34.8343	32.4809	31.0118
TDRD7	ENSFCAG00000002745	D4:62136057-62196965	3.09879	1.88943	2.45546
CDK6	ENSFCAG00000002746	A2:96459449-96703612	21.3502	19.4896	24.67
CLTCL1	ENSFCAG00000002747	D3:27661077-27763200	0.00909164	0.0599462	0
SLC27A3	ENSFCAG00000002749	F1:68374601-68378674	24.77	6.04431	19.1927
HIRA	ENSFCAG00000002750	D3:27545549-27619849	19.0698	19.4514	18.8938
GATAD2B	ENSFCAG00000002751	F1:68311422-68350281	15.486	15.4455	15.773
MRPL40	ENSFCAG00000002752	D3:27522218-27526181	20.0303	21.8496	18.1278
-	ENSFCAG00000002753	D1:108242990-108244916	0	0	0
TAOK1	ENSFCAG00000002755	E1:16848147-16983653	20.8657	20.5519	18.6917
ABHD15	ENSFCAG00000002756	E1:16827927-16832297	2.054	2.83359	2.01389
TP53I13	ENSFCAG00000002757	E1:16822046-16825813	19.5779	25.6718	22.7045
GIT1	ENSFCAG00000002758	E1:16805657-16820233	16.9886	18.2164	17.8593
ANKRD13B	ENSFCAG00000002759	E1:16785058-16801999	1.03221	2.01265	2.05673
CORO6	ENSFCAG00000002760	E1:16777781-16783341	1.98723	4.52988	2.00055
SSH2	ENSFCAG00000002761	E1:16619467-16767191	6.22223	4.11539	4.72057
CYP4B1	ENSFCAG00000002762	C1:36232391-36252137	8.77072	6.45672	8.36676
FIGN	ENSFCAG00000002763	C1:152855254-152857534	1.95845	1.25212	1.84722
-	ENSFCAG00000002766	C1:36255541-36278828	0	0	0
SYCP2L	ENSFCAG00000002768	B2:17606047-17698421	0	0	0
TREML1	ENSFCAG00000002773	B2:42149530-42154430	0	0	0
TREM2	ENSFCAG00000002774	B2:42158511-42162809	0	0	0
TREM1	ENSFCAG00000002776	B2:42219495-42229473	0	0	0
ABHD12B	ENSFCAG00000002777	B3:99969813-99998902	0.566532	0.310614	0.348493
PYGL	ENSFCAG00000002778	B3:99999574-100040827	79.7237	53.9354	43.5786
TRIM9	ENSFCAG00000002779	B3:100073798-100183885	0	0.0214501	0.0304515
TMX1	ENSFCAG00000002780	B3:100289874-100304603	40.4789	33.0029	42.3514
AGO2	ENSFCAG00000002782	F2:79489937-79543256	20.1043	22.4953	21.2793
RNF165	ENSFCAG00000002784	D3:67814651-67921006	0.620377	1.14339	1.70122
LOXHD1	ENSFCAG00000002785	D3:67935050-68101041	0	0	0
ST8SIA5	ENSFCAG00000002786	D3:68118716-68154196	2.61233	1.29117	2.07544
PIAS2	ENSFCAG00000002787	D3:68227693-68291588	22.7045	23.9346	20.8735
HDHD2	ENSFCAG00000002788	D3:68341277-68465540	20.0923	19.0315	17.9185
TPCN2	ENSFCAG00000002792	D1:112725444-112749057	11.2513	13.0128	10.2729
MSL3	ENSFCAG00000002794	X:8259013-8271418	13.9476	14.3805	11.6442
-	ENSFCAG00000002796	B1:75474378-75589585	0	0	0
2016-09-02	ENSFCAG00000002797	C1:221001361-221037538	150.331	163.758	154.356
FARP2	ENSFCAG00000002801	C1:221054942-221157413	3.60216	5.31221	3.5663
FAM65B	ENSFCAG00000002802	B2:4843523-4905217	0.0135848	0.0148666	0
STK25	ENSFCAG00000002803	C1:221054942-221157413	18.7481	20.2979	18.0028
-	ENSFCAG00000002804	B2:4587275-4640419	0	0.0531823	0
POLR2F	ENSFCAG00000002806	B4:133870342-133904696	78.998	92.3218	83.8531
SOX10	ENSFCAG00000002807	B4:133909765-133918496	0.124417	0.368093	0.163217
PICK1	ENSFCAG00000002809	B4:133979224-133998616	5.84733	9.34597	5.29287
BAIAP2L2	ENSFCAG00000002811	B4:134008020-134034359	0	0	0.0477846
PLA2G6	ENSFCAG00000002812	B4:134035966-134081749	3.10682	3.37992	2.24422
CSNK1E	ENSFCAG00000002814	B4:134176724-134200604	16.6089	25.7224	16.0014
KDELR3	ENSFCAG00000002816	B4:134273830-134306442	220.131	290.051	232.41
FAM227A	ENSFCAG00000002819	B4:134381423-134449039	0.0953955	0.104757	0.0182905
TOMM22	ENSFCAG00000002820	B4:134466774-134468193	85.6544	88.4424	76.3127
JOSD1	ENSFCAG00000002821	B4:134471913-134480550	57.1473	46.9233	46.6992
SALL4	ENSFCAG00000002822	A3:10232978-10241182	0.0210358	0.011516	0.016419
DLG4	ENSFCAG00000002824	E1:2062947-2654649	9.75978	11.9354	11.1042
FAM208A	ENSFCAG00000002825	A2:24321371-24422215	15.9523	14.2356	15.1121
ACADVL	ENSFCAG00000002826	E1:2062947-2654649	65.0443	58.0411	60.2184
ELP5	ENSFCAG00000002827	E1:2062947-2654649	24.1781	21.0732	22.1013
PIK3CB	ENSFCAG00000002828	C2:123614138-123719812	1.43533	2.13708	1.58881
TEK	ENSFCAG00000002830	D4:52636433-52742274	0.012861	0.0563632	0.059461
EQTN	ENSFCAG00000002831	D4:52785885-52798758	0	0	0
QDPR	ENSFCAG00000002832	B1:191955299-191974086	40.9695	39.0424	37.5691
CLRN2	ENSFCAG00000002833	B1:191937431-191944308	0	0	0
FAM184B	ENSFCAG00000002835	B1:191776928-191854327	0.176212	0.319299	0.227399
DCAF16	ENSFCAG00000002836	B1:191675258-191675906	2.43296	1.17875	1.54083
OR2AE1	ENSFCAG00000002837	E3:6790318-6791326	0	0	0
SPP1	ENSFCAG00000002838	B1:133030913-133037066	7.10262	14.658	3.81927
PKD2	ENSFCAG00000002839	B1:132955249-133008822	24.7934	27.8087	22.6304
ABCG2	ENSFCAG00000002841	B1:132904460-132947469	5.40124	5.33886	4.34997
SOD2	ENSFCAG00000002843	B2:145782510-145792128	30.9639	23.4993	29.1038
WTAP	ENSFCAG00000002844	B2:145821822-145840686	25.966	25.3785	25.073
ACAT2	ENSFCAG00000002845	B2:145847829-145875068	79.1724	65.3669	86.528
TCP1	ENSFCAG00000002846	B2:145847829-145875068	130.65	129.702	132.408
MRPL18	ENSFCAG00000002847	B2:145876265-145880570	59.8151	65.3285	65.5178
-	ENSFCAG00000002848	B2:145881966-145901010	0.0251081	0.0554031	0.0582436
MAS1	ENSFCAG00000002849	B2:145939545-145940523	0	0	0
IGF2R	ENSFCAG00000002850	B2:146019151-146101865	79.0375	74.4552	78.9739
SLC22A1	ENSFCAG00000002851	B2:146110690-146140042	0	0	0.0266655
SLC22A2	ENSFCAG00000002852	B2:146171113-146201039	0	0	0
NAP1L2	ENSFCAG00000002853	X:60545137-60546529	6.14202	4.61414	4.13851
CPSF6	ENSFCAG00000002855	B4:96417821-96439385	40.545	42.5996	42.2734
AKR1A1	ENSFCAG00000002857	C1:35099922-35114600	68.6111	58.4979	70.882
-	ENSFCAG00000002858	E2:6756076-6764296	0	0	0
-	ENSFCAG00000002859	C1:35125894-35171792	6.60396	6.20704	8.10038
SIGLECL1	ENSFCAG00000002860	E2:6712247-6727549	0	0	0
IGLON5	ENSFCAG00000002861	E2:6671776-6678459	0.321111	0.646786	0.33639
CCDC17	ENSFCAG00000002862	C1:35125894-35171792	0.436002	0.1506	0.276521
VSIG10L	ENSFCAG00000002863	E2:6659814-6665707	0.124148	0.0676565	0.113978
GPBP1L1	ENSFCAG00000002864	C1:35174591-35209392	12.5705	14.6873	13.5913
ETFB	ENSFCAG00000002865	E2:6642506-6656647	41.481	39.056	36.0567
-	ENSFCAG00000002866	E2:6577253-6587080	0	0	0
ARHGEF17	ENSFCAG00000002868	D1:60866884-61017256	15.5084	18.3544	15.1949
RELT	ENSFCAG00000002869	D1:60840271-60845831	0.522859	0.529831	0.381053
FAM168A	ENSFCAG00000002870	D1:60807609-60828443	8.45673	10.3475	7.36675
SCAPER	ENSFCAG00000002872	B3:31334204-31848478	1.40952	2.61791	2.63143
-	ENSFCAG00000002874	D1:103046771-103047710	0	0	0
TPO	ENSFCAG00000002875	A3:141585852-141628903	0	0	0.0130775
TOM1L1	ENSFCAG00000002879	E1:33540506-33587090	1.88937	0.715552	1.54891
TRIM69	ENSFCAG00000002880	B3:60660848-60709023	0	0	0
BARX2	ENSFCAG00000002881	D1:26025335-26101072	0	0	0
FEM1B	ENSFCAG00000002883	B3:39219936-39231291	25.607	27.1259	22.8872
PCED1A	ENSFCAG00000002886	A3:29420915-29425932	12.3025	10.7236	12.2061
SRSF10	ENSFCAG00000002888	C1:16947562-16954215	49.3077	44.3345	52.0581
LENG8	ENSFCAG00000002889	E2:3448596-3455536	25.0341	30.7161	27.5998
PTPN5	ENSFCAG00000002890	D1:76680151-76713238	0.566411	0.0911914	0.352957
NUGGC	ENSFCAG00000002892	B1:50488759-50531182	0.049612	0	0.0254193
GZMB	ENSFCAG00000002893	B3:76495762-76499307	0	0	0
PLA2G2C	ENSFCAG00000002894	C1:13834358-13846395	0	0	0
VWA5B1	ENSFCAG00000002896	C1:13963662-14005402	0	0	0
GANC	ENSFCAG00000002897	B3:62775248-62850246	1.39197	1.00966	0.51103
ZNF106	ENSFCAG00000002899	B3:62680758-62710967	25.0268	25.6384	27.7247
SOX13	ENSFCAG00000002900	F1:41999287-42141315	4.83499	4.33956	3.74671
PCLO	ENSFCAG00000002901	A2:87572331-87987165	0.016762	0.0245575	0.0278474
REN	ENSFCAG00000002902	F1:41999287-42141315	0	0	0.0305217
RGS5	ENSFCAG00000002903	F1:61417860-61464563	0.292601	0.0819498	0
SERPINI2	ENSFCAG00000002904	C2:97564047-97595762	0	0	0
RAG1	ENSFCAG00000002908	D1:92125945-92129077	0	0	0
-	ENSFCAG00000002909	D1:92140952-92142534	0	0	0
CXADR	ENSFCAG00000002911	C2:25996827-26049872	4.59726	4.60378	4.0989
RIMS3	ENSFCAG00000002913	C1:30640472-30653393	1.56594	0.214379	0.921501
NFYC	ENSFCAG00000002915	C1:30731127-30761476	10.0714	10.6939	8.82745
CNOT10	ENSFCAG00000002916	C2:155210781-155272289	17.67	20.4672	21.2111
KCNQ4	ENSFCAG00000002917	C1:30769487-30822092	0	0.0270075	0.0193981
TRIM71	ENSFCAG00000002918	C2:155336295-155355573	0	0	0
CCR4	ENSFCAG00000002919	C2:155404997-155406080	0	0.116222	0.0405077
SUSD5	ENSFCAG00000002920	C2:155567408-155612037	0.023351	0.0255015	0.0365106
TACSTD2	ENSFCAG00000002921	C1:46762404-46762743	0.512497	0.577117	0.99431
CEP72	ENSFCAG00000002925	A1:238861867-238895688	0.662558	0.41503	0.931998
DZIP1	ENSFCAG00000002928	A1:66478086-66530415	28.8143	28.1918	29.6711
LYNX1	ENSFCAG00000002929	F2:81184654-81188688	0	0	0
NLRC5	ENSFCAG00000002930	E2:36313954-36370641	3.26731	3.20985	3.02657
CPNE2	ENSFCAG00000002931	E2:36395107-36426292	38.2079	41.4695	37.7014
CBR3	ENSFCAG00000002933	C2:9275873-9283538	12.6548	7.8049	8.14177
FAM192A	ENSFCAG00000002934	E2:36432907-36454451	24.8702	27.8852	22.4456
DOPEY2	ENSFCAG00000002935	C2:9166219-9263771	6.43455	5.01487	4.43363
RSPRY1	ENSFCAG00000002936	E2:36476993-36508800	9.03738	10.8611	9.82674
ARL2BP	ENSFCAG00000002937	E2:36513274-36520856	51.5868	45.602	52.162
PLLP	ENSFCAG00000002938	E2:36524963-36529526	0	0	0
CCL22	ENSFCAG00000002939	E2:36595879-36600442	0	0.541359	0
MORC3	ENSFCAG00000002940	C2:9113474-9143375	7.90288	9.38464	6.947
CHAF1B	ENSFCAG00000002941	C2:9080586-9101233	8.6914	6.21224	10.2652
CLDN14	ENSFCAG00000002942	C2:9021720-9022431	0	0	0
HLCS	ENSFCAG00000002943	C2:8562224-8770451	4.53954	3.04871	3.39111
RIPPLY3	ENSFCAG00000002944	C2:8514216-8526504	0	0	0
SUMO3	ENSFCAG00000002945	E1:56853078-56962910	44.3266	44.2612	48.7528
WDFY3	ENSFCAG00000002946	B1:135888078-136127688	10.4463	8.3218	9.85851
MAEA	ENSFCAG00000002950	B1:199301247-199331192	37.7342	38.6414	32.647
UVSSA	ENSFCAG00000002951	B1:199341693-199366449	3.75528	3.29429	4.39876
CD163	ENSFCAG00000002952	B4:41616926-41643504	0.022739	0.0249714	0
BMP2K	ENSFCAG00000002953	B1:141324027-141451316	10.1908	11.5935	12.1003
SPATA7	ENSFCAG00000002954	B3:133306451-133349494	6.46531	6.04244	7.29934
PTPN21	ENSFCAG00000002955	B3:133362244-133408769	11.9345	15.2112	10.9748
NFAT5	ENSFCAG00000002956	E2:47001930-47108259	17.0565	20.2225	19.2347
NOB1	ENSFCAG00000002958	E2:47153380-47163481	32.1484	38.7184	35.6624
[truncated: 19,531 more rows]
